# Supplementary material
Source: MDPI journal article supplement (https://www.mdpi.com/2073-4352/11/11/1369)
Supplement: s1 [file s1]

Supplementary materials

# Thermal Stability and Radiation Tolerance of Lanthanide-Doped Cerium Oxide Nanocubes

Kory Burns <sup>1,2</sup>, Paris C. Reuel <sup>3</sup>, Fernando Guerrero <sup>3</sup>, Eric Lang <sup>1</sup>, Ping Lu <sup>1</sup>, Assel Aitkaliyeva <sup>2</sup>, Khalid Hattar <sup>1,\*</sup> and Timothy J. Boyle <sup>3,\*</sup>

<sup>1</sup> Sandia National Laboratories, PO Box 8500, Albuquerque, NM 87185, USA; kdburns@sandia.gov (K.B.); ejlang@sandia.gov (E.L.); plu@sandia.gov (P.L.)

<sup>2</sup> Department of Materials Science and Engineering, University of Florida, Gainesville, FL 32611, USA; aitkaliyeva@mse.ufl.edu

<sup>3</sup> Advanced Materials Laboratory, Sandia National Laboratories, Albuquerque, NM 87106, USA; preuel@sandia.gov (P.C.R.); 2guerrero2@gmail.com (F.G.)

\* Correspondence: khattar@sandia.gov (K.H.); tjboyle@sandia.gov (T.J.B.); Tel.: +1-(505)-272-7625 (T.J.B.)

a i)

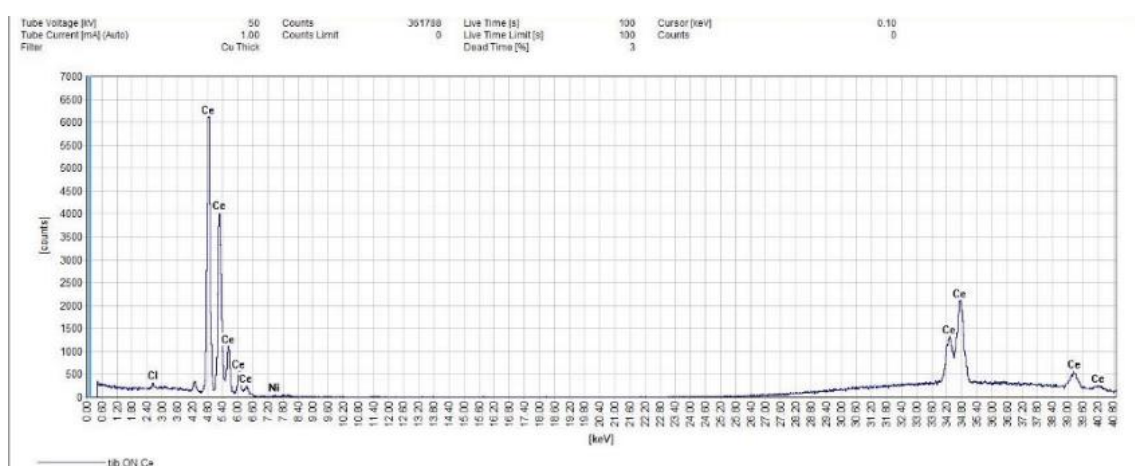

a ii)

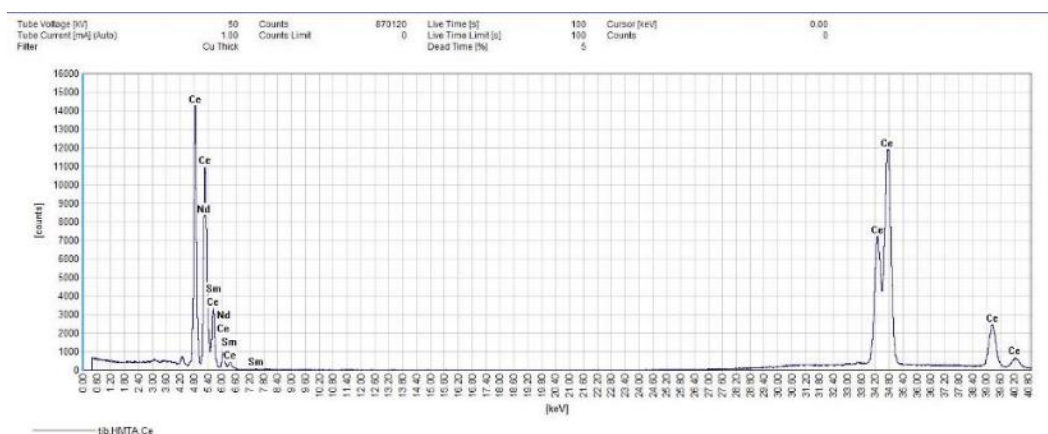

a iii)

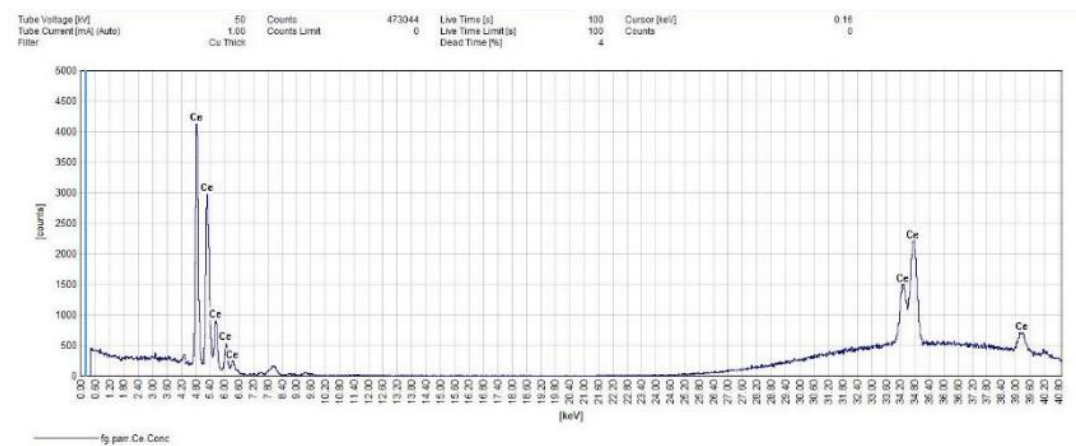

b i)

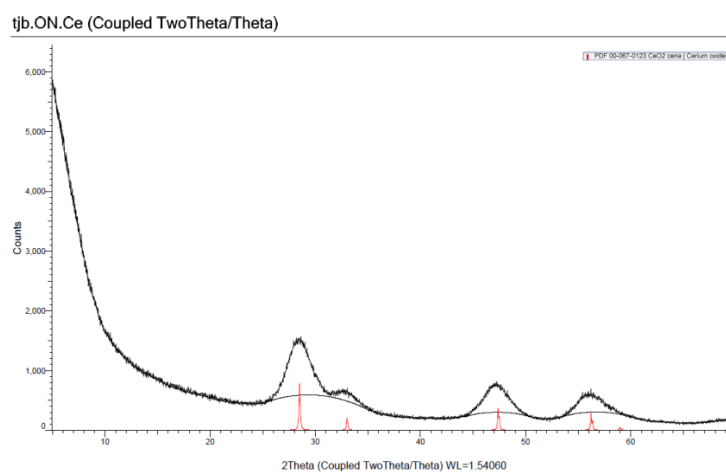

b ii)

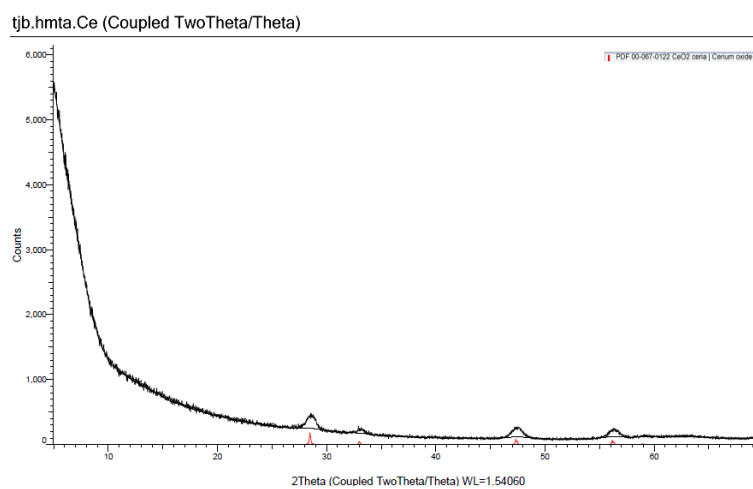

b iii)

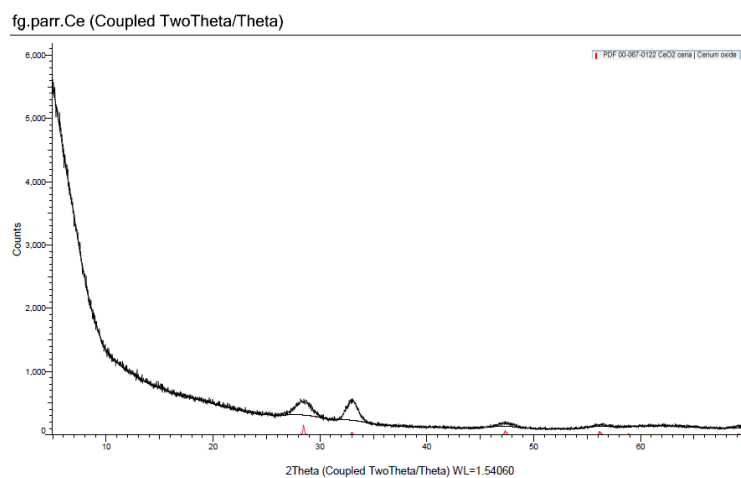

b\* i)

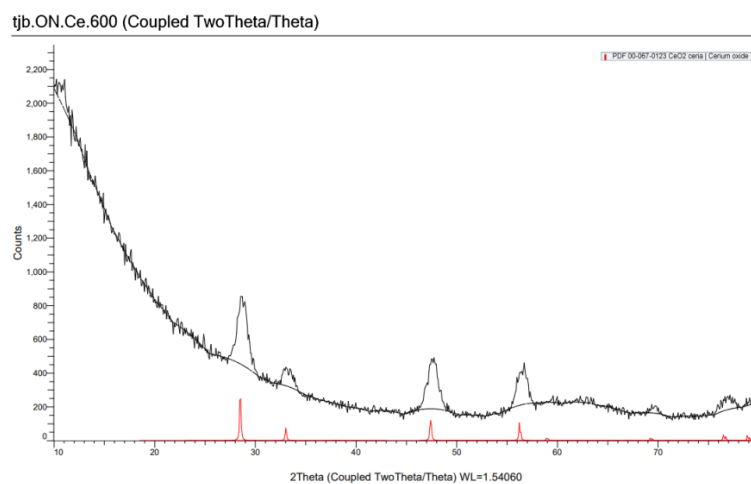

b\* ii)

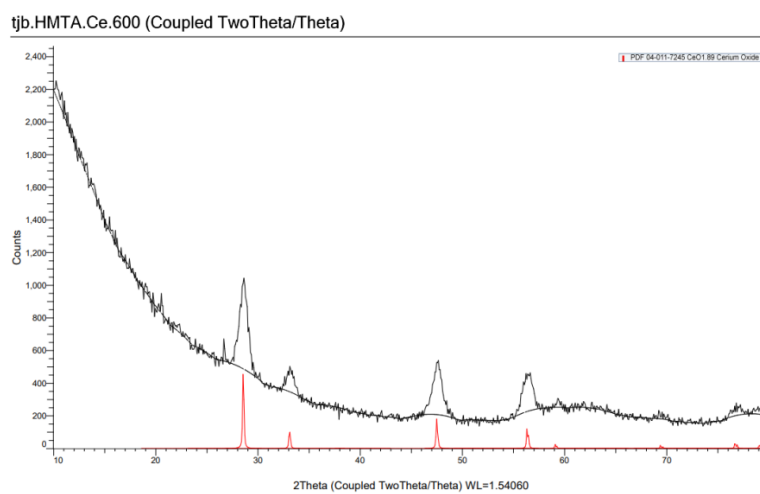

b\* iii)

phase already matched

c i)

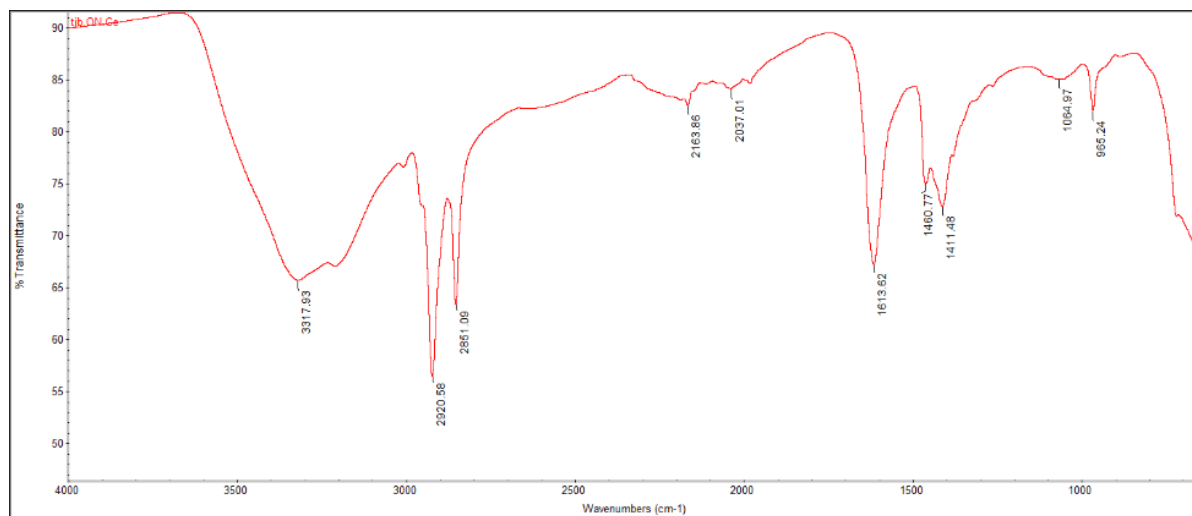

c ii)

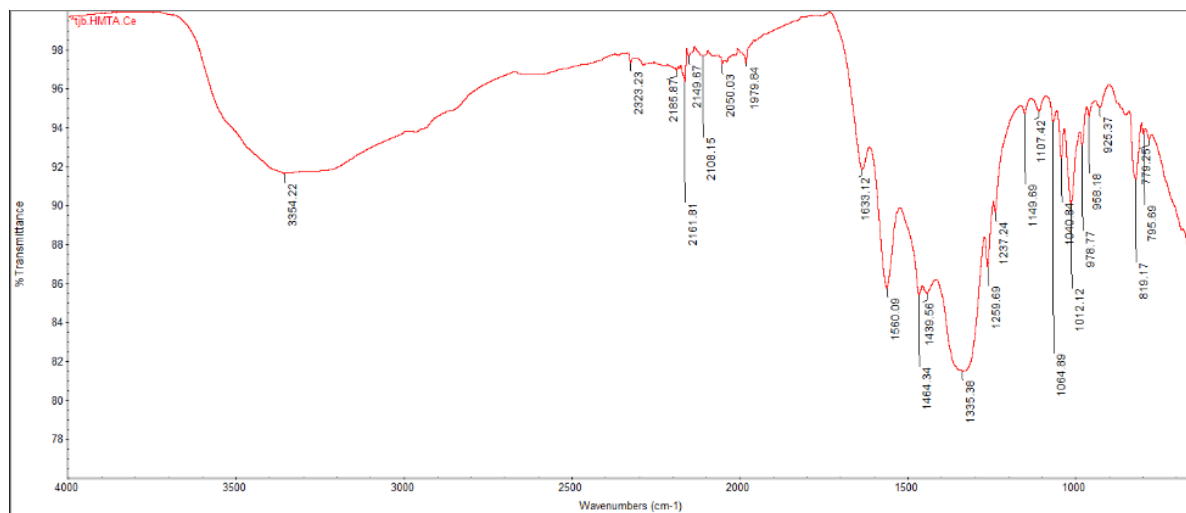

c iii)

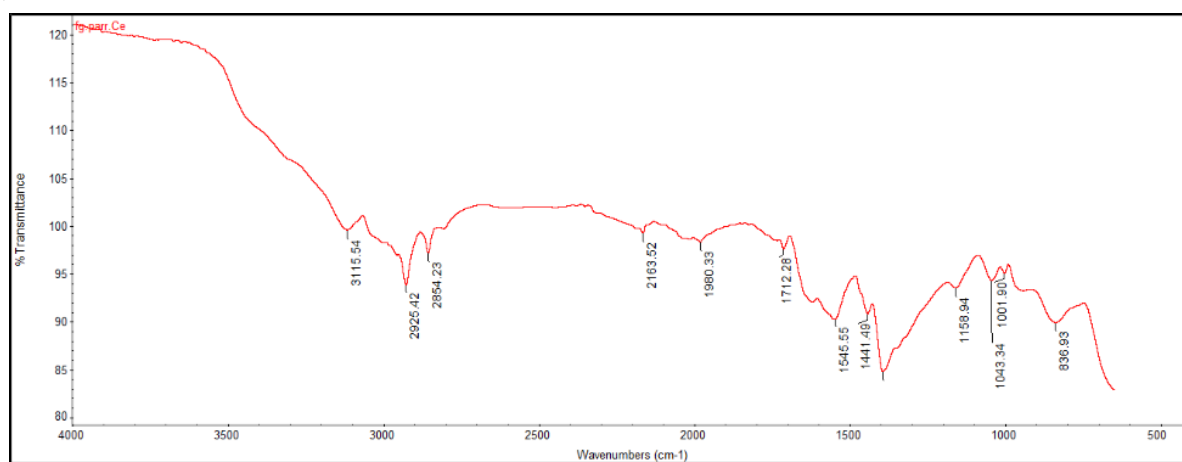

d i)

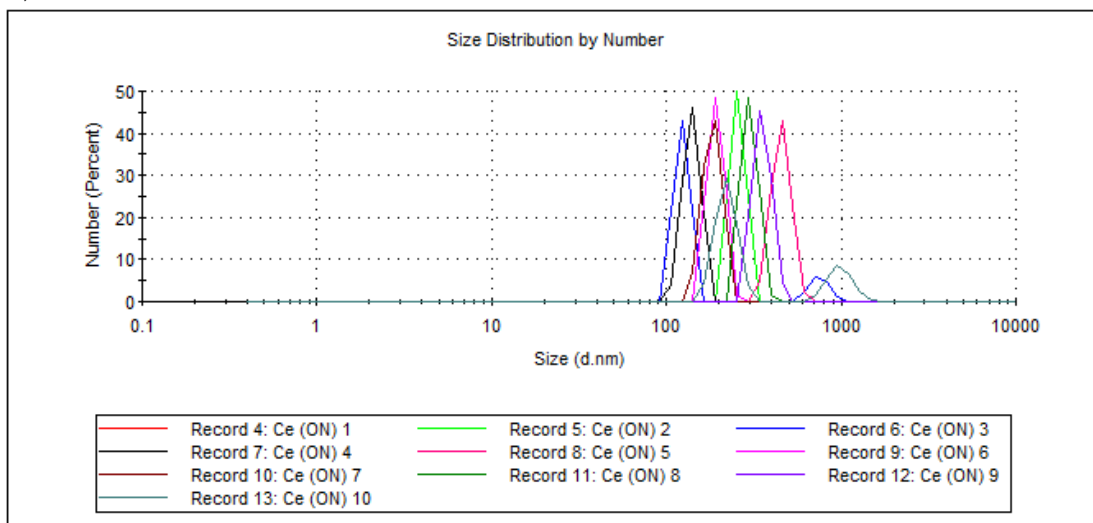

d ii)

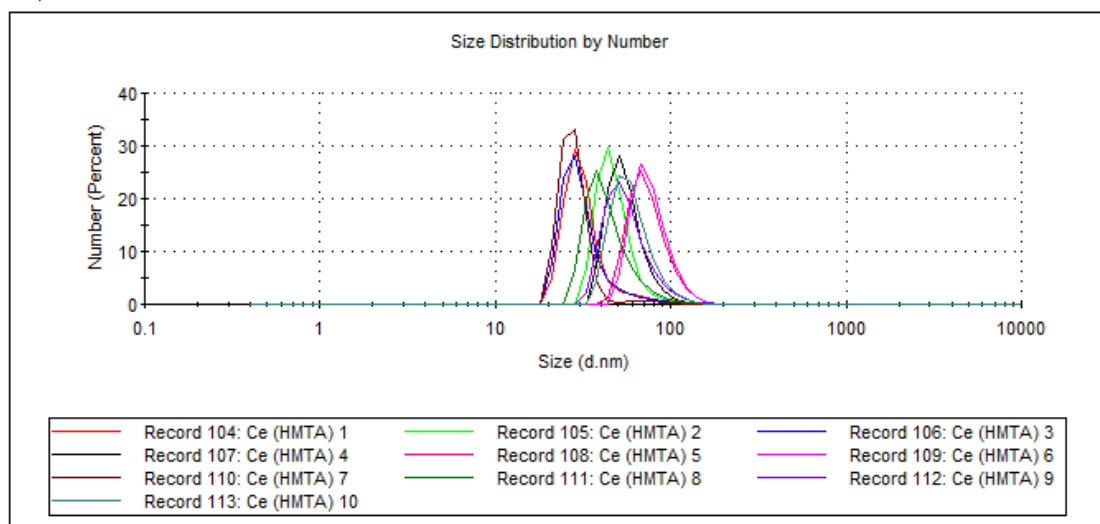

d iii)

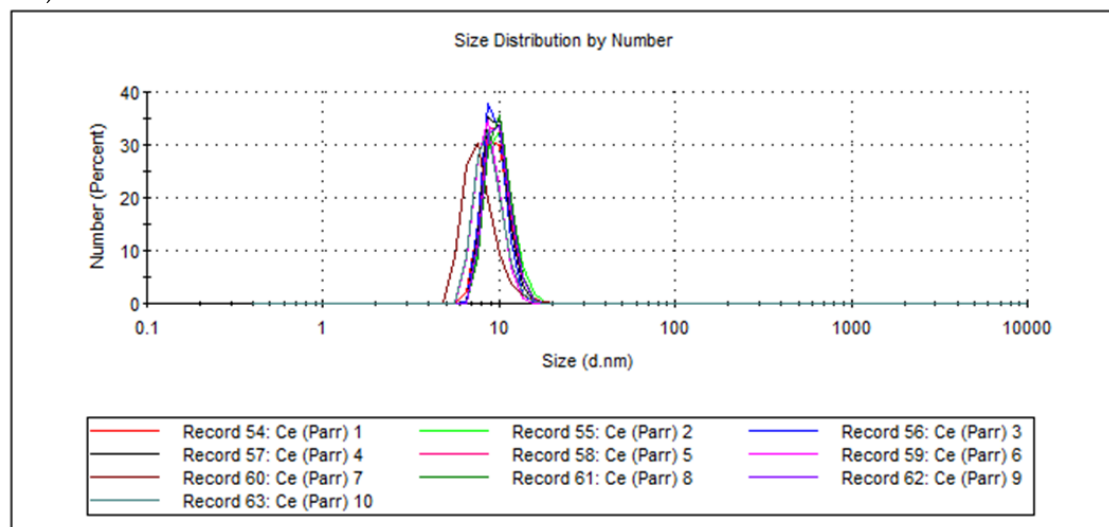

e i)

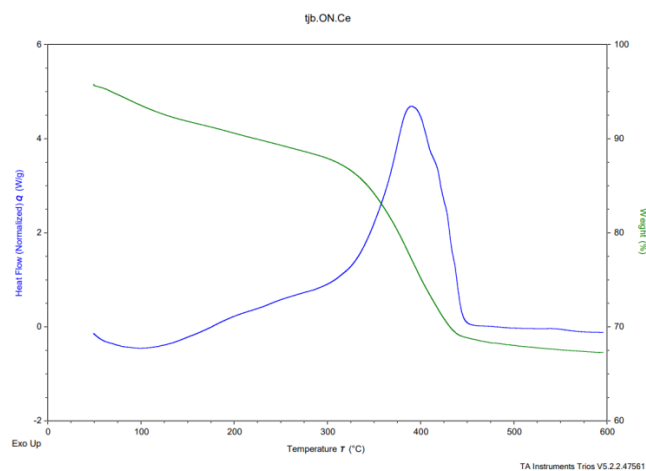

e ii)

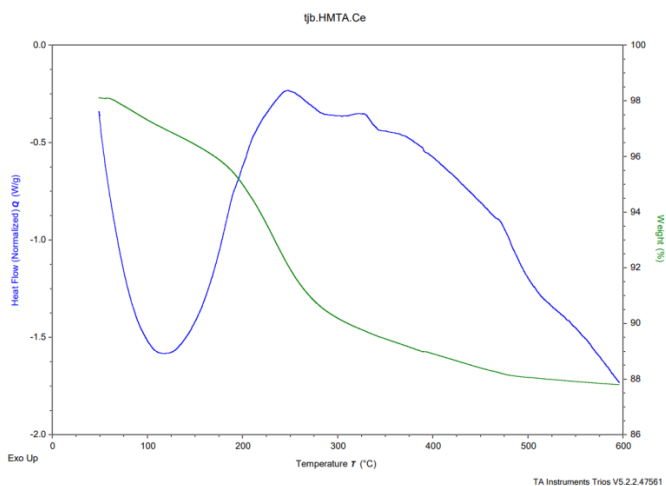

e iii)

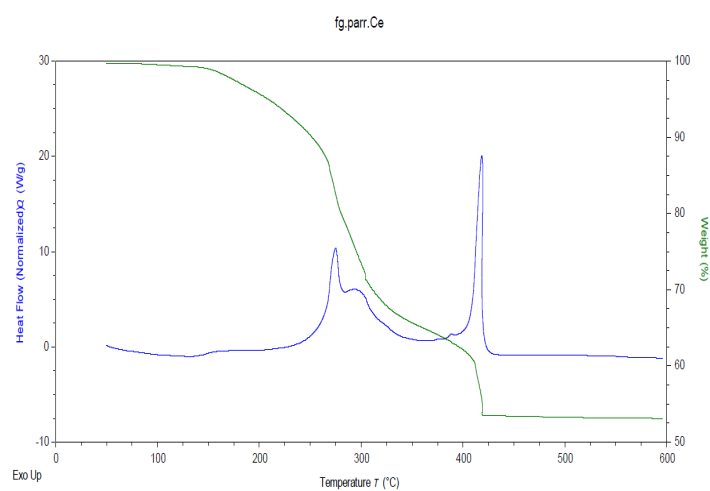

**Figure S1.** Analytical data for generated CeOx (a) XRF [(i) ON, (ii) HMTA, (iii) TBA], (b) pXRD RT [(i) ON, (ii) HMTA, (iii) TBA], (b\*) pXRD 600°C [(i) ON, (ii) HMTA, (iii) TBA], (c) FTIR [(i) ON, (ii) HMTA, (iii) TBA], (d) DLS [(i) ON, (ii) HMTA, (iii) TBA], (e) TGA/DSC [(i) ON, (ii) HMTA, (iii) TBA].

a i)

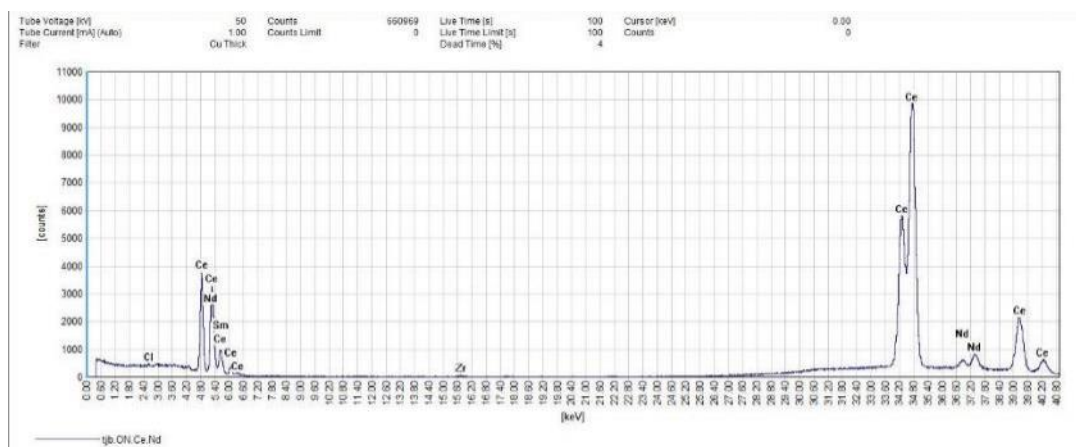

a ii)

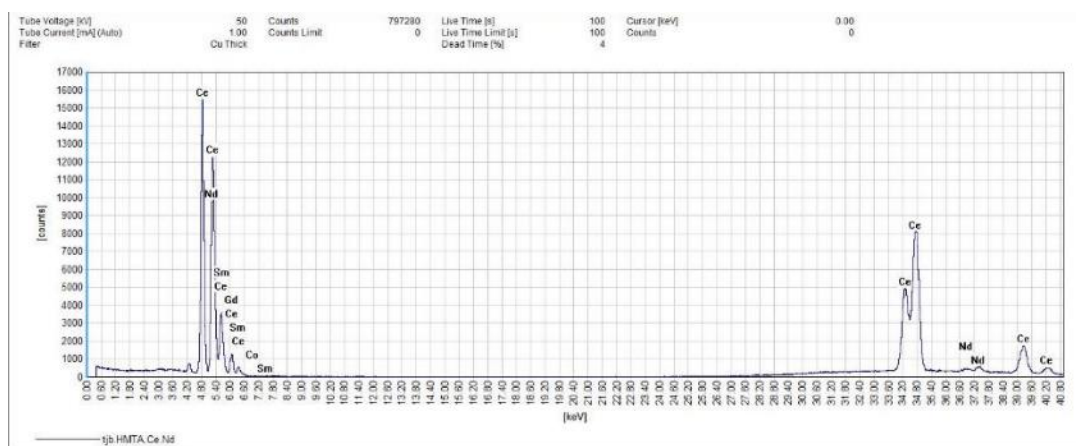

a iii)

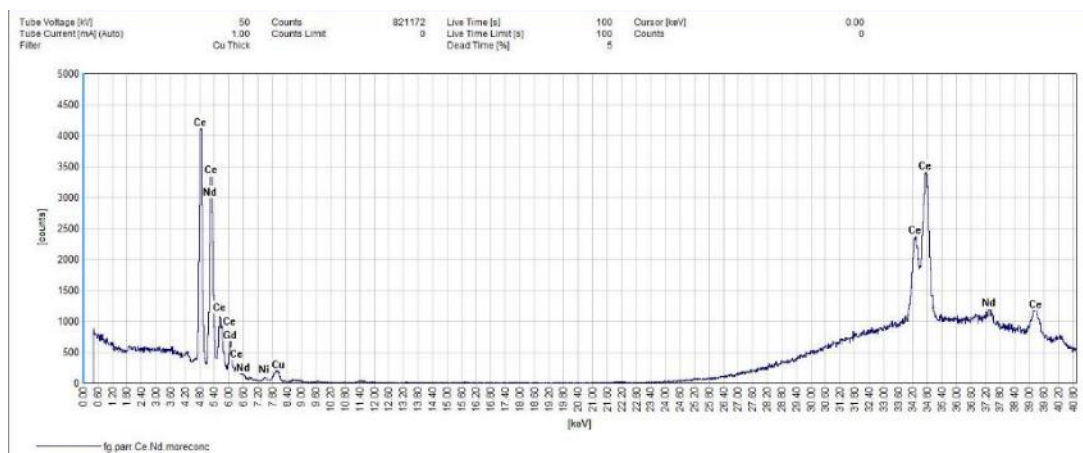

b i)

tjb.ON.Ce.Nd (Coupled TwoTheta/Theta)

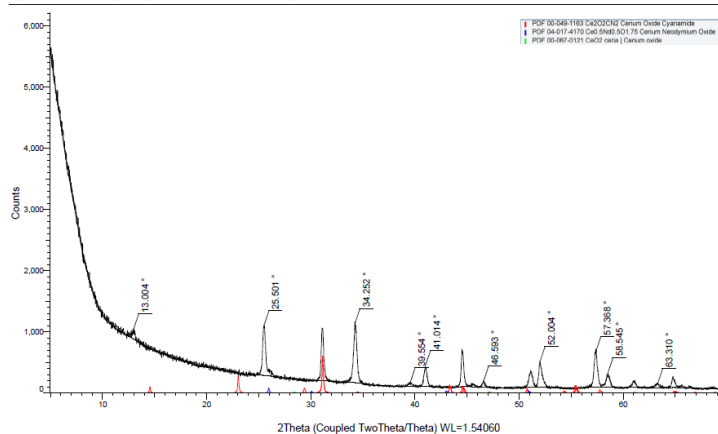

b ii)

tjb.HMTA.Ce.Nd (Coupled TwoTheta/Theta)

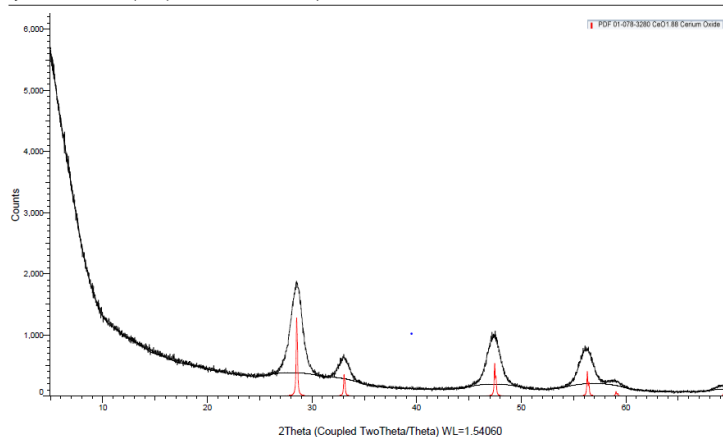

b iii)

fg.parr.Ce.Nd (Coupled TwoTheta/Theta)

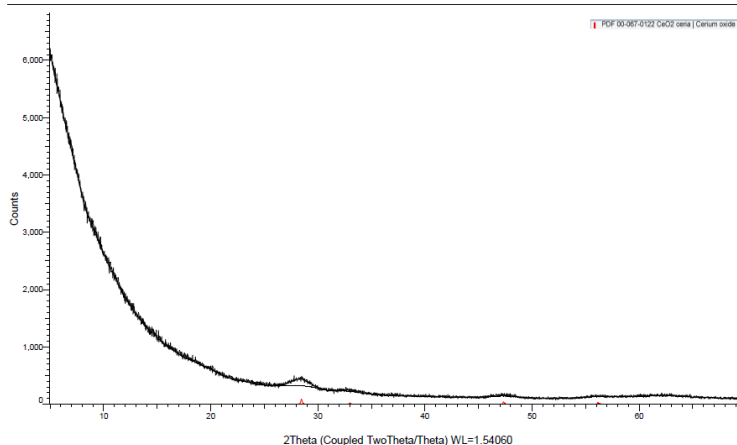



b\* i)

tjb.ON.Ce.Nd.600 (Coupled TwoTheta/Theta)

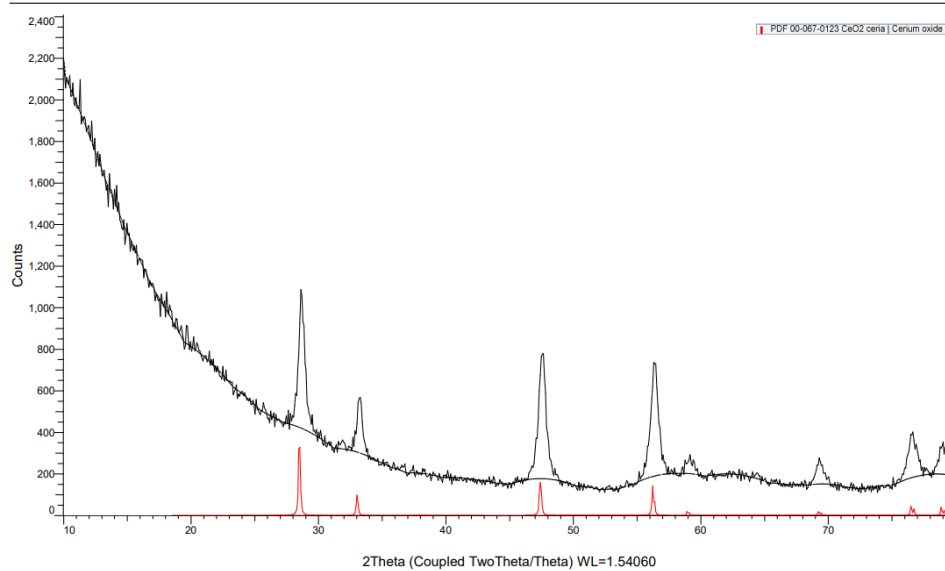

b\* ii) phase already matches

b\* iii) phase already matches

c i)

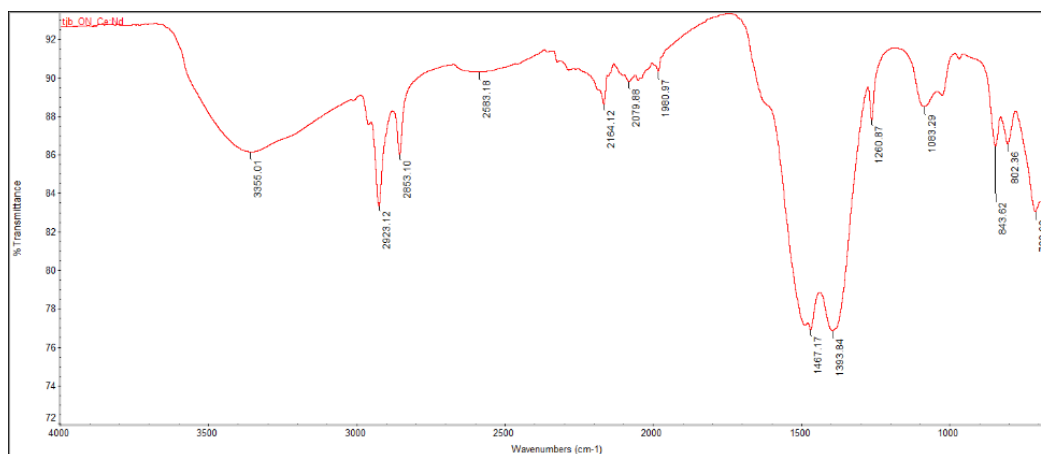

c ii)

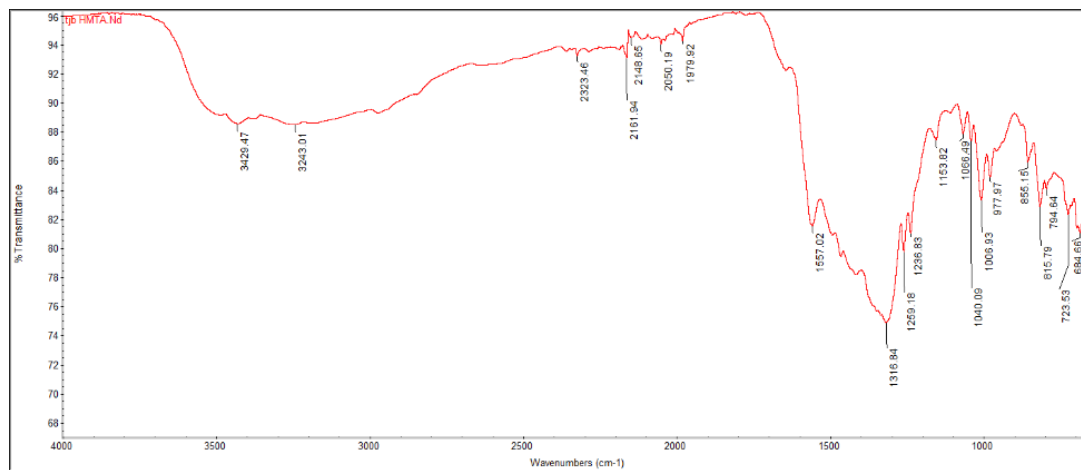

c iii)

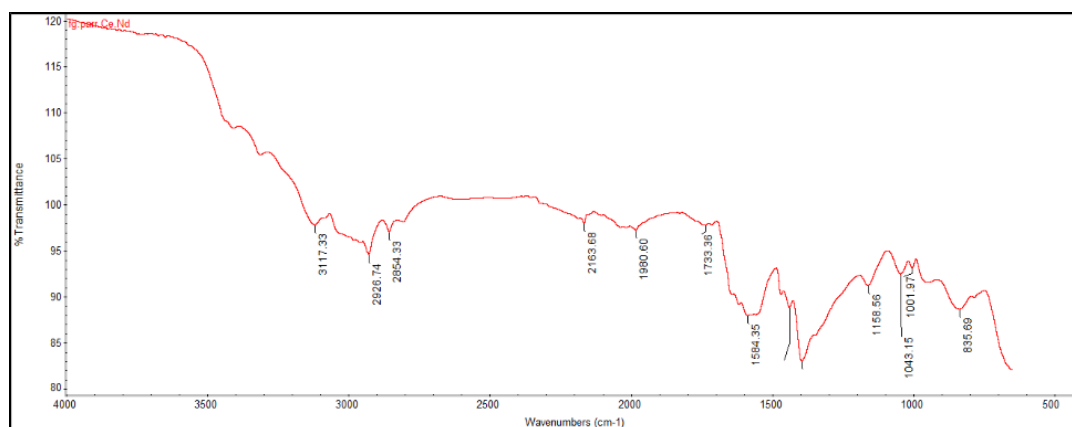

d i)

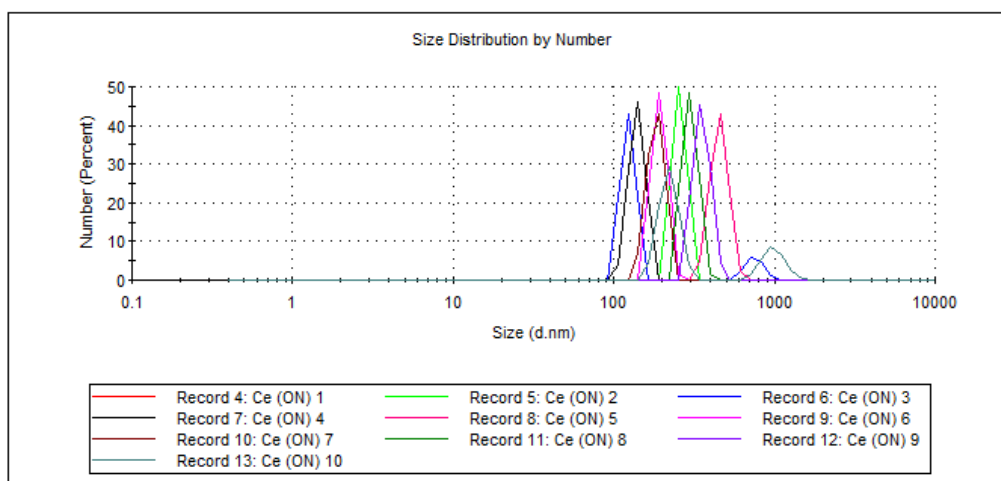

d ii)

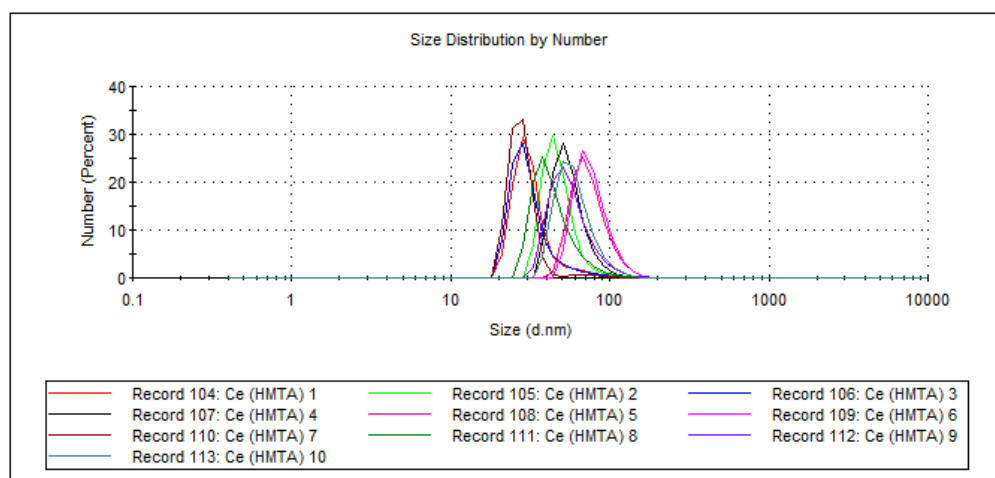

d iii)

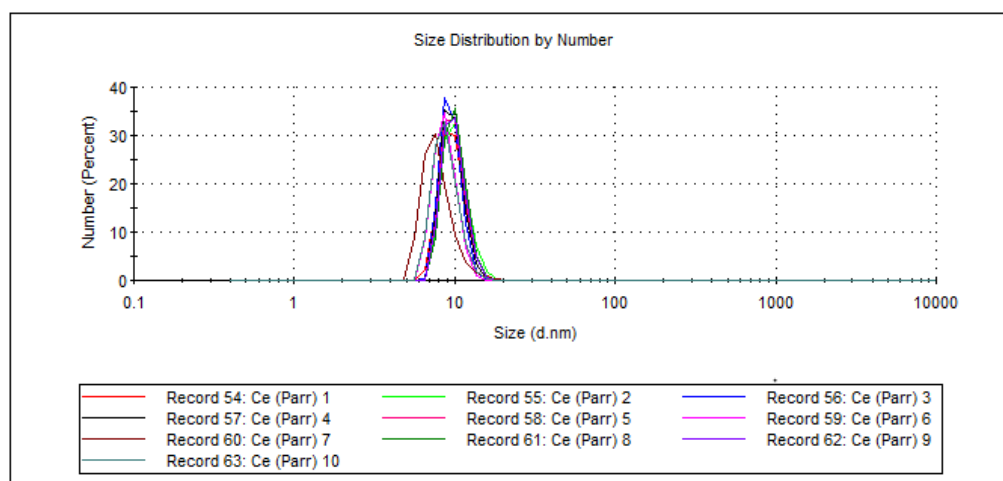

**Figure S2.** Analytical data for generated Nd:CeO<sub>x</sub> (a) XRF [(i) ON, (ii) HMTA, (iii) TBA], (b) pXRD RT [(i) ON, (ii) HMTA, (iii) TBA], (b\*) pXRD 600°C [(i) ON, (ii) HMTA, (iii) TBA], (c) FTIR [(i) ON, (ii) HMTA, (iii) TBA], (d) DLS [(i) ON, (ii) HMTA, (iii) TBA].

a i)

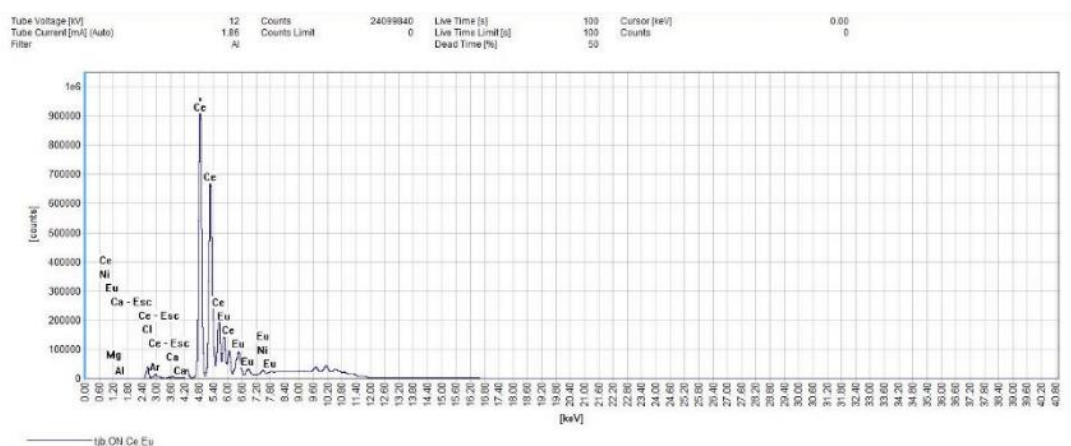

a ii)

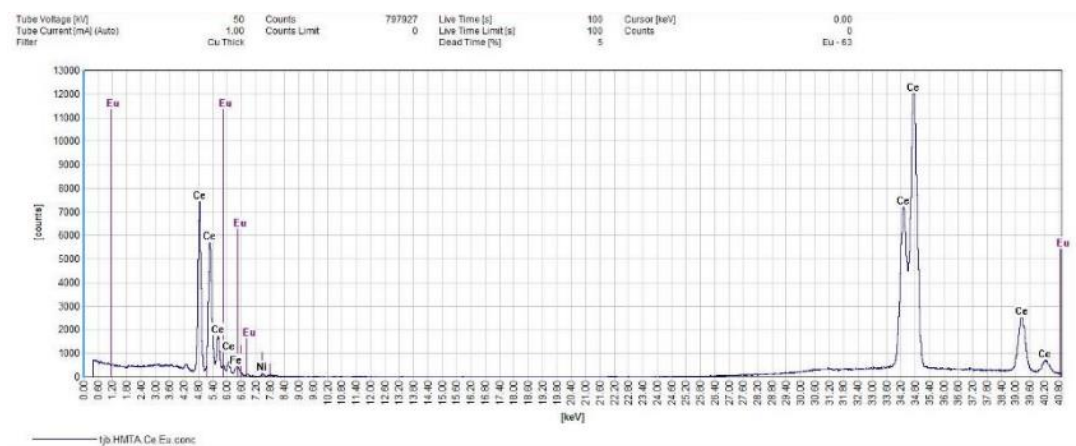

a iii)

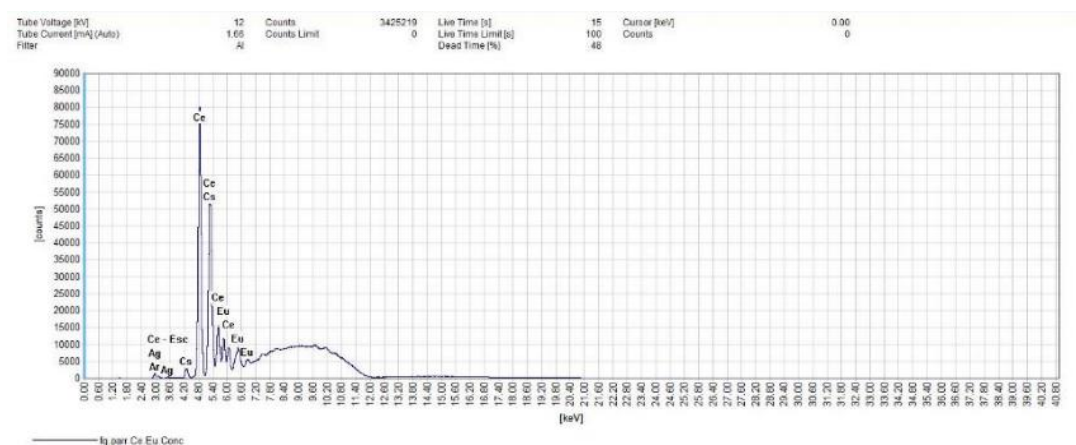

b ii)

tjb.HMTA.Ce.Eu (Coupled TwoTheta/Theta)

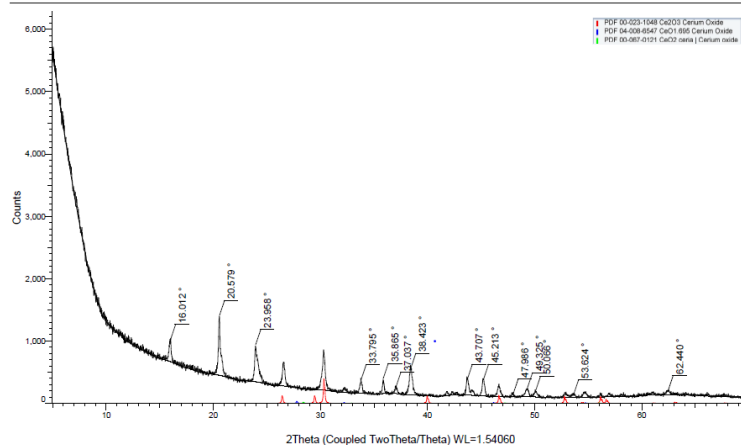

b iii)

fg.parr.Ce.Eu (Coupled TwoTheta/Theta)

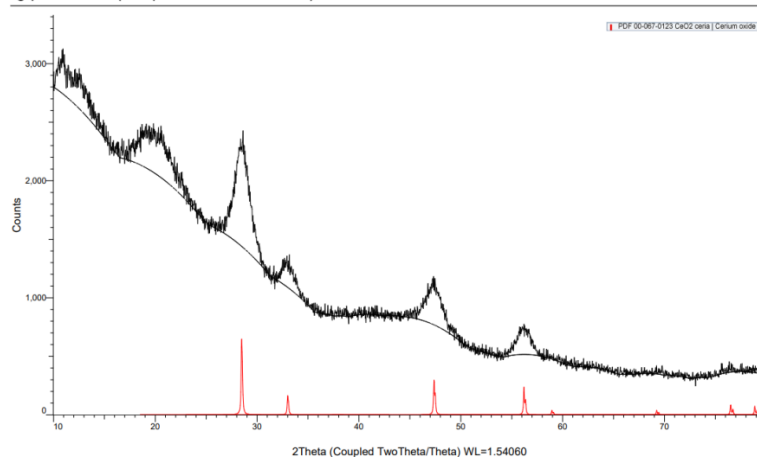

b\* i)

tjb.ON.Ce.Eu.600 (Coupled TwoTheta/Theta)

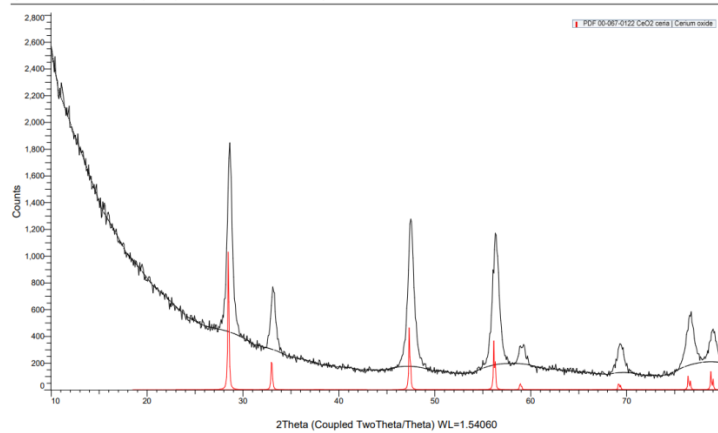

b\* ii)

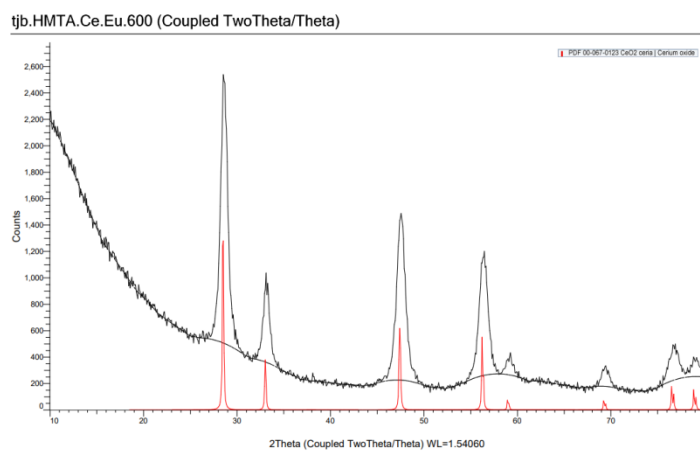

b\* iii) phase already matches

c i)

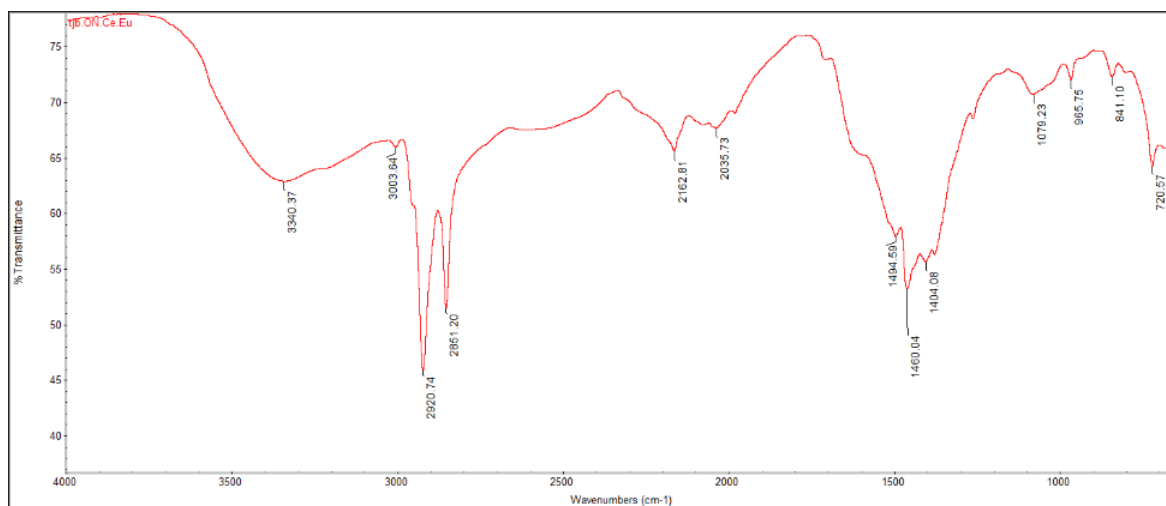

c ii)

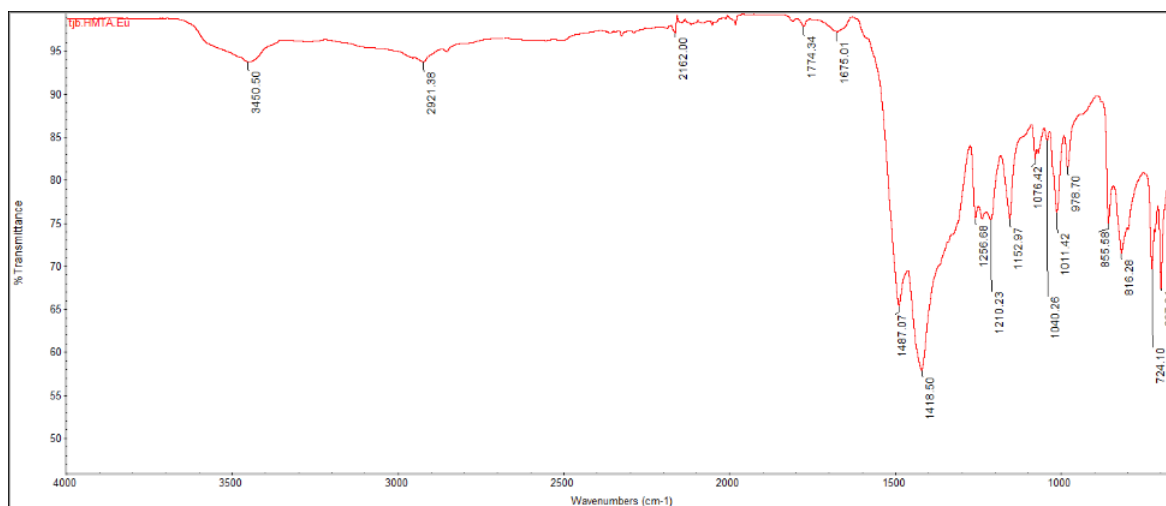

c iii)

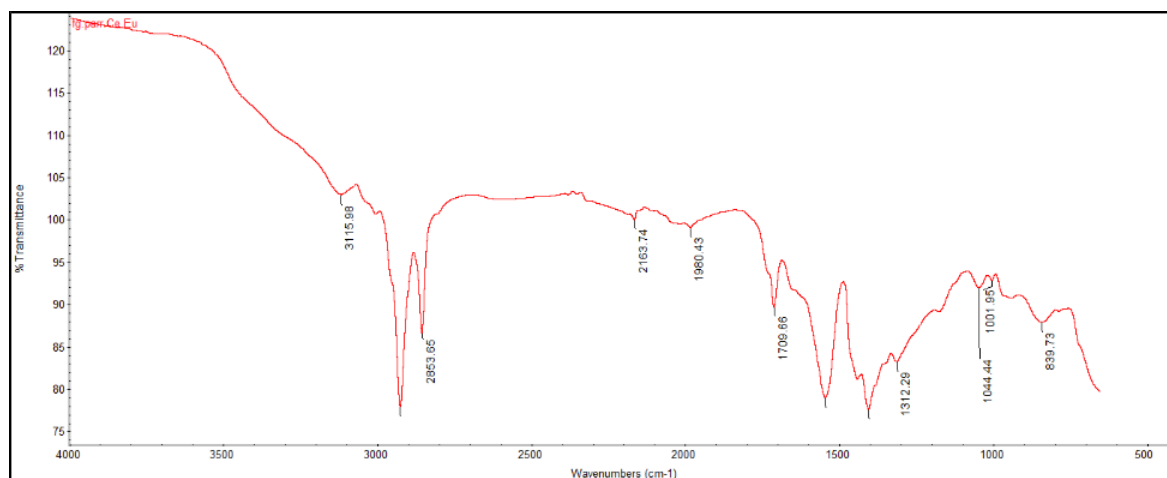

d i)

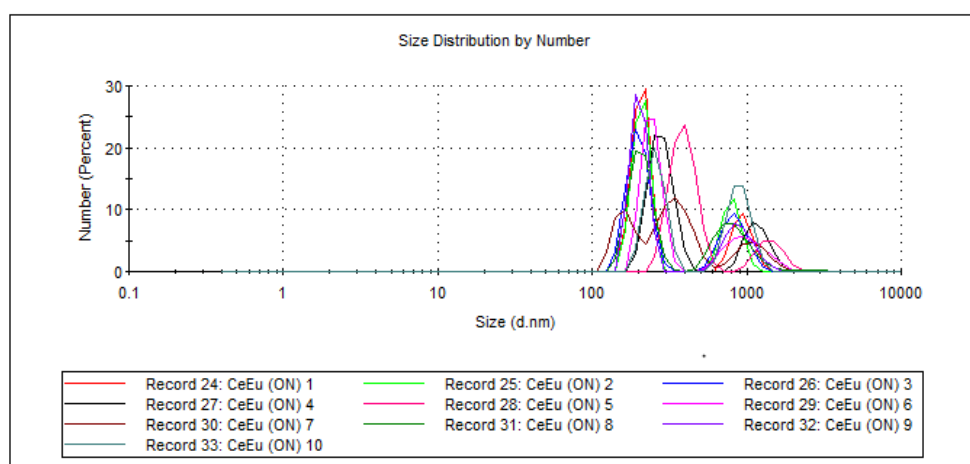

d ii)

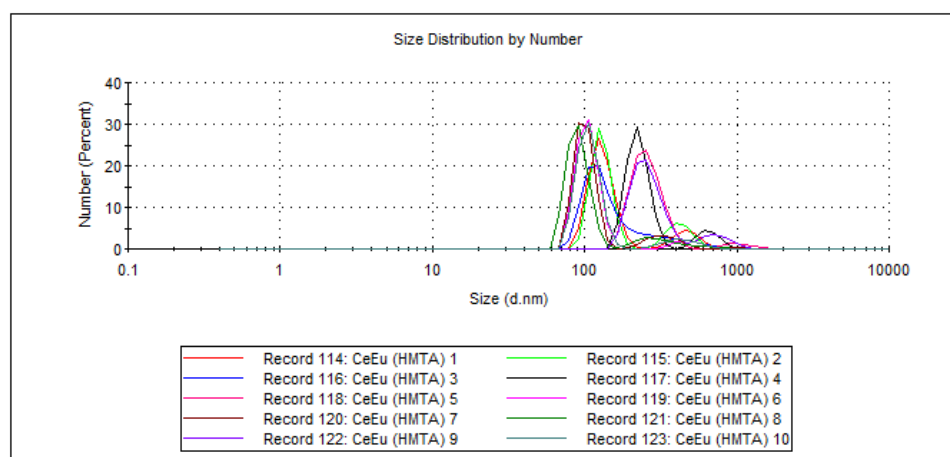

d iii)

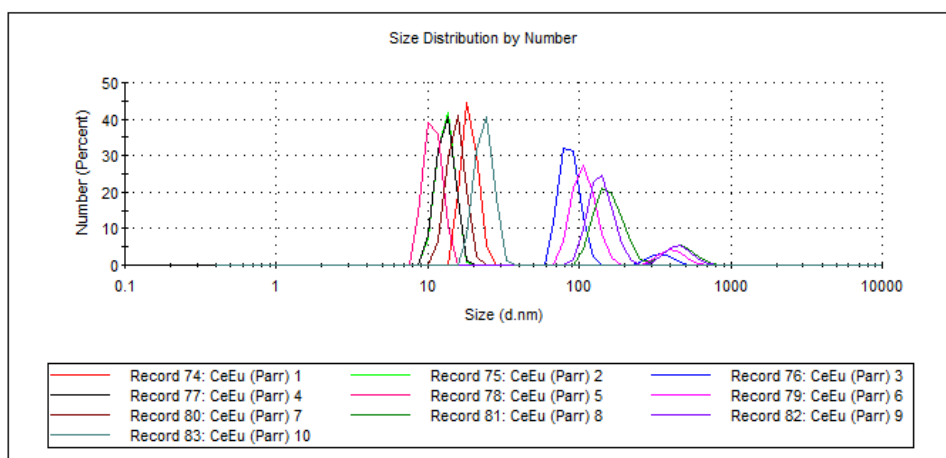

e i)

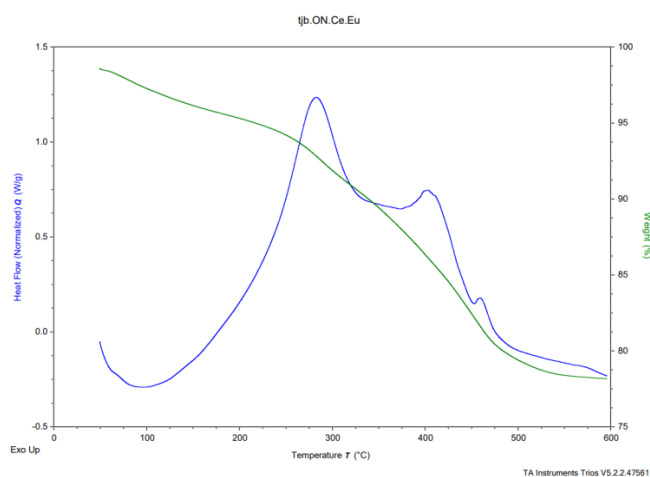

e ii)

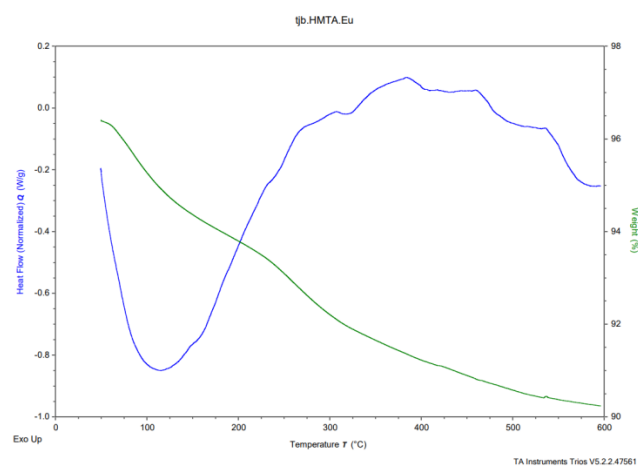



e iii)

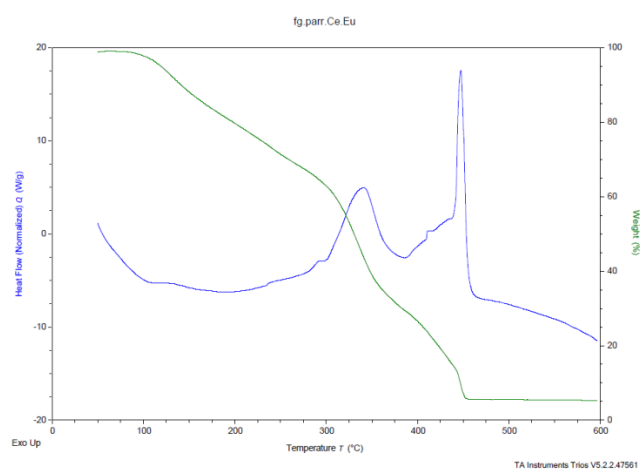

Figure S3. Analytical data for generated Eu:CeO<sub>x</sub> (a) XRF [(i) ON, (ii) HMTA, (iii) TBA], (b) pXRD RT [(i) ON, (ii) HMTA, (iii) TBA], (b\*) pXRD 600°C [(i) ON, (ii) HMTA, (iii) TBA], (c) FTIR [(i) ON, (ii) HMTA, (iii) TBA], (d) DLS [(i) ON, (ii) HMTA, (iii) TBA], (e) TGA/DSC [(i) ON, (ii) HMTA, (iii) TBA].

a i)

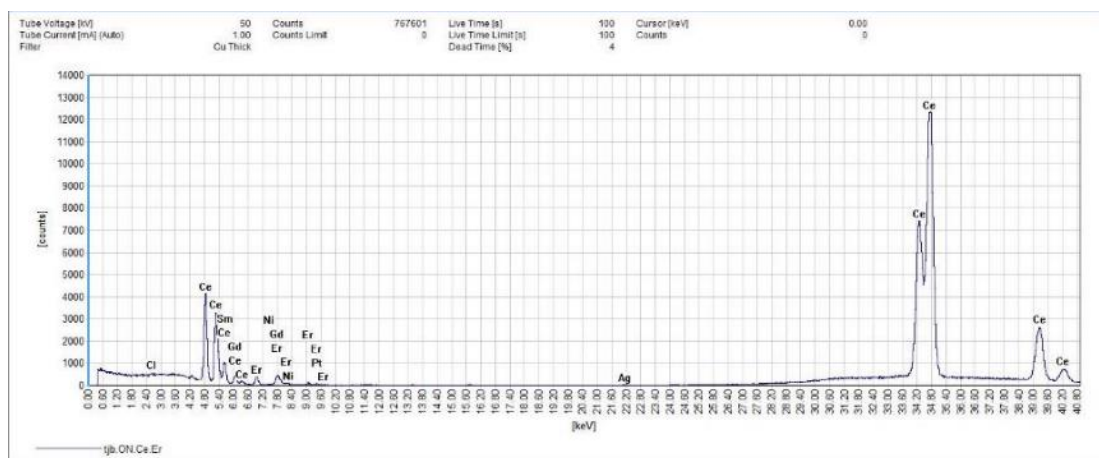

a ii)

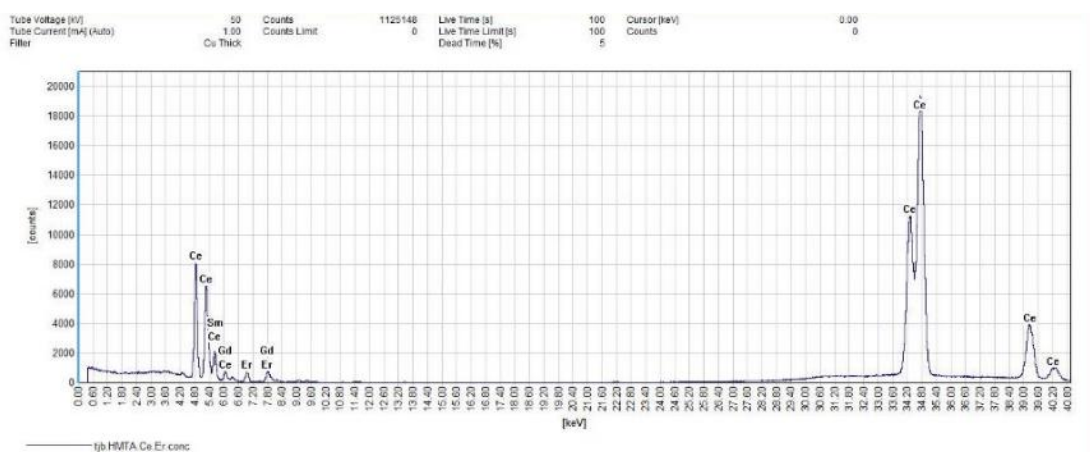

a iii)

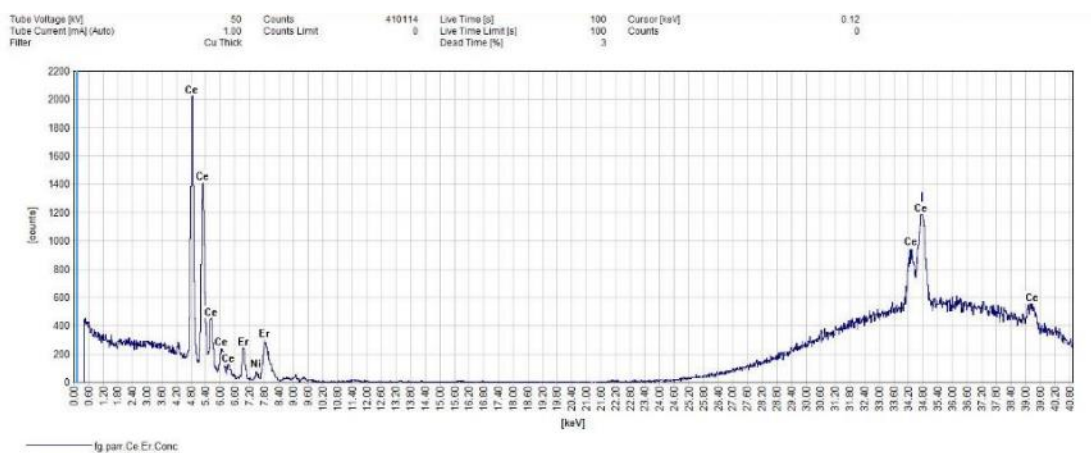

b i)

tjb.ON.Ce.Er (Coupled TwoTheta/Theta)

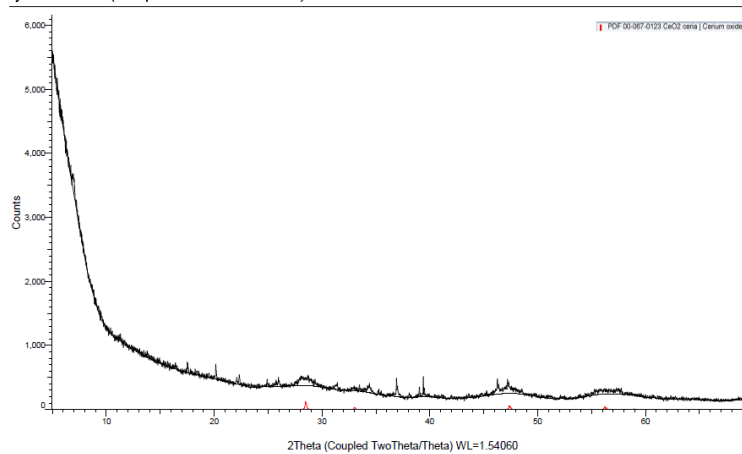

b ii)

tjb.HMTA.Ce.Er (Coupled TwoTheta/Theta)

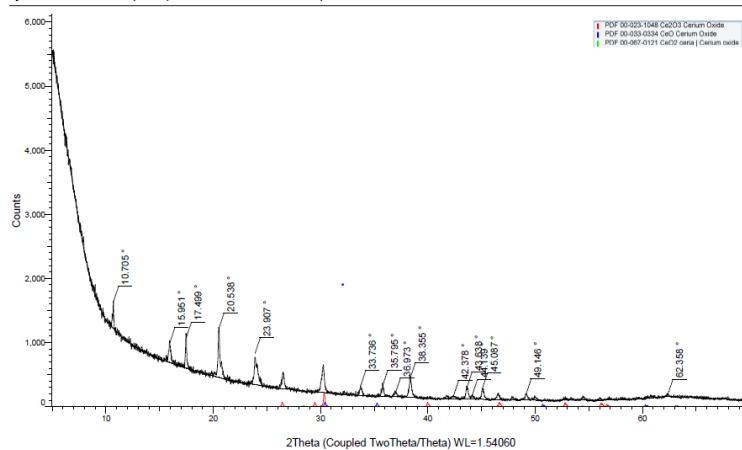

b iii)

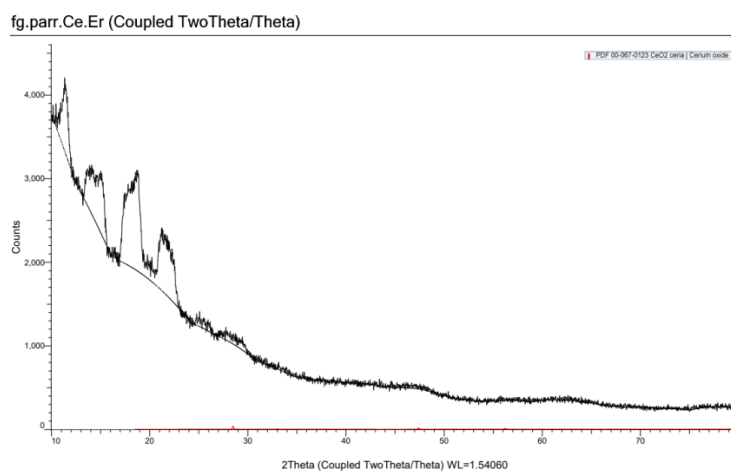

b\* i)

tjb.ON.Ce.Er.600 (Coupled TwoTheta/Theta)

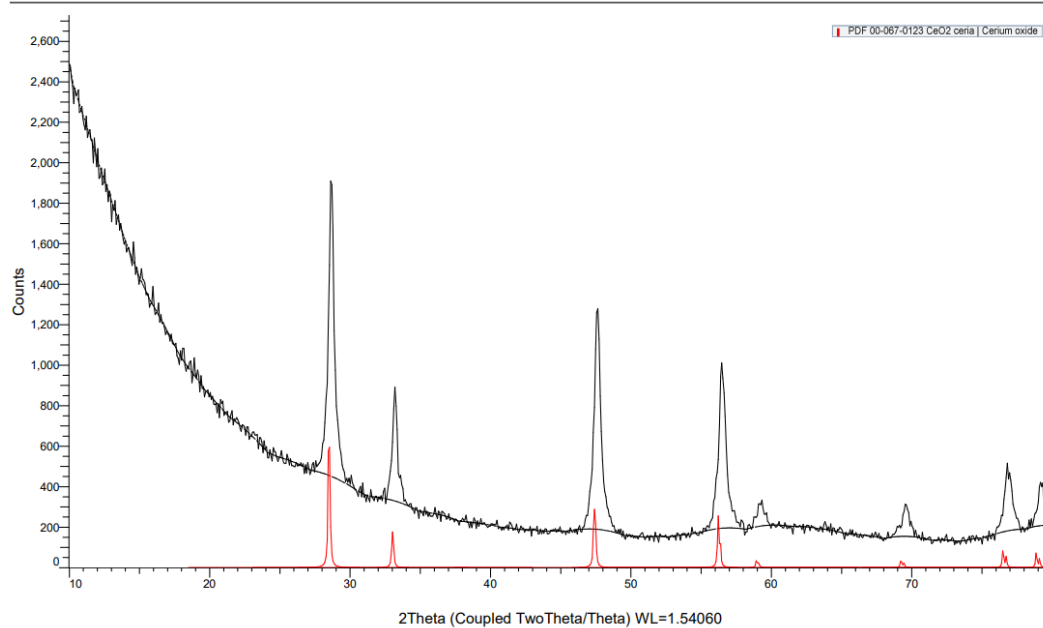

b\* ii)

tjb.HMTA.Ce.Er.600 (Coupled TwoTheta/Theta)

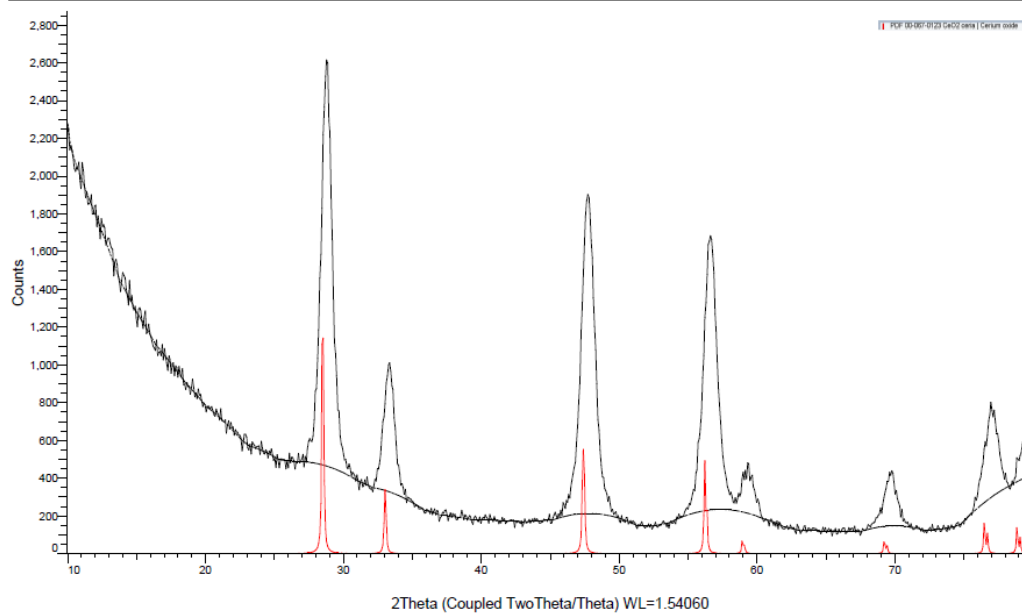

b\* iii) phase already matches

c i)

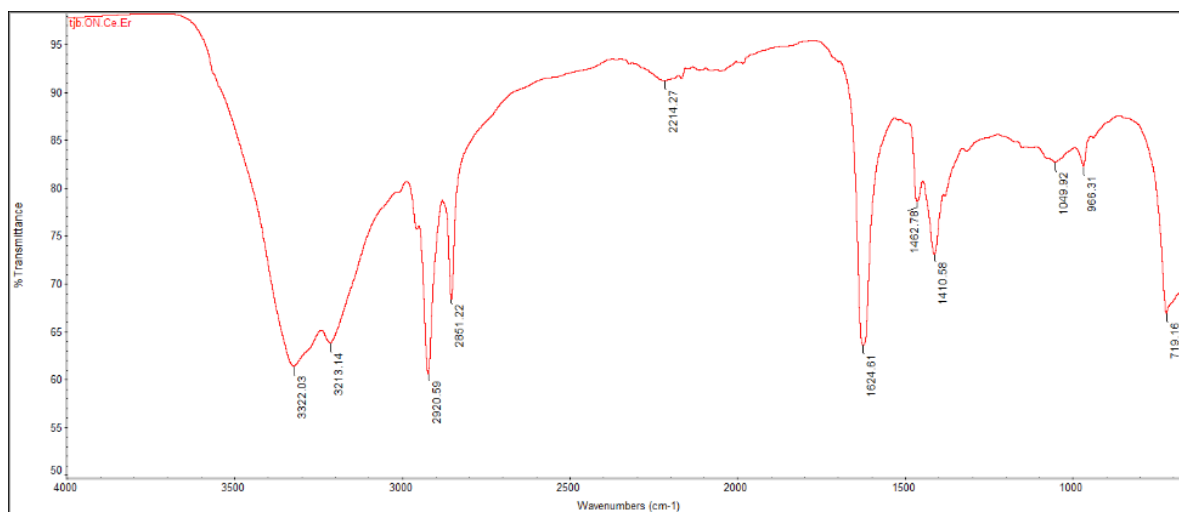

c ii)

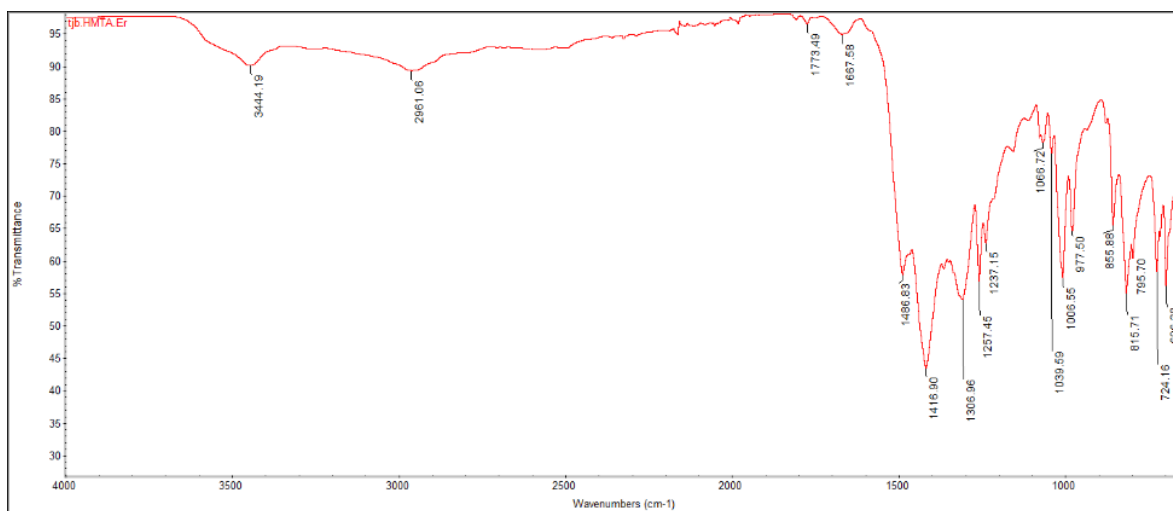

c iii)

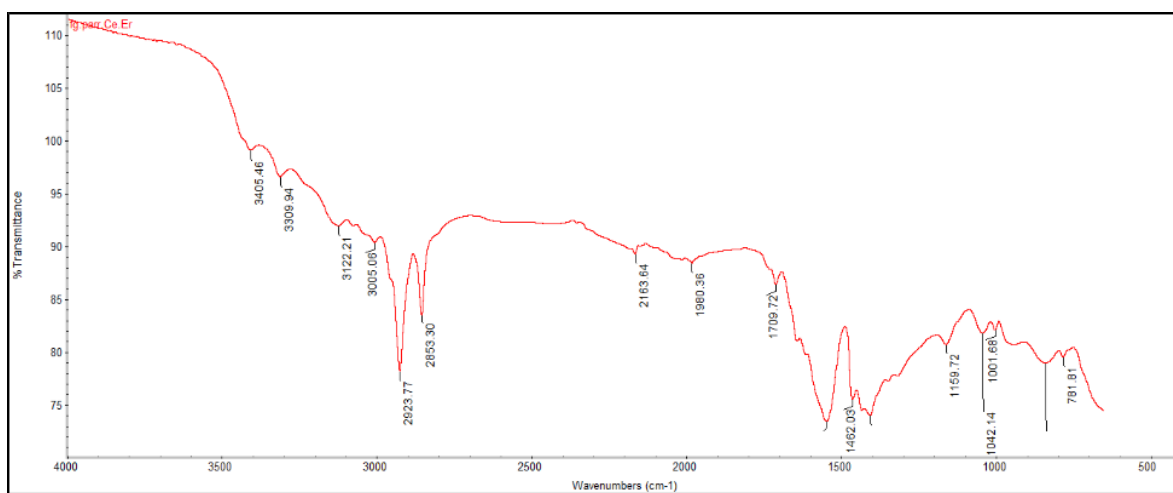

d i)

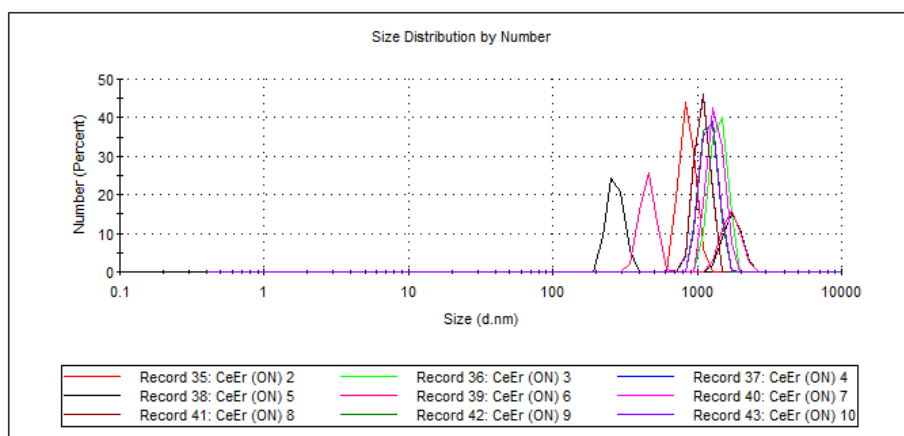

d ii)

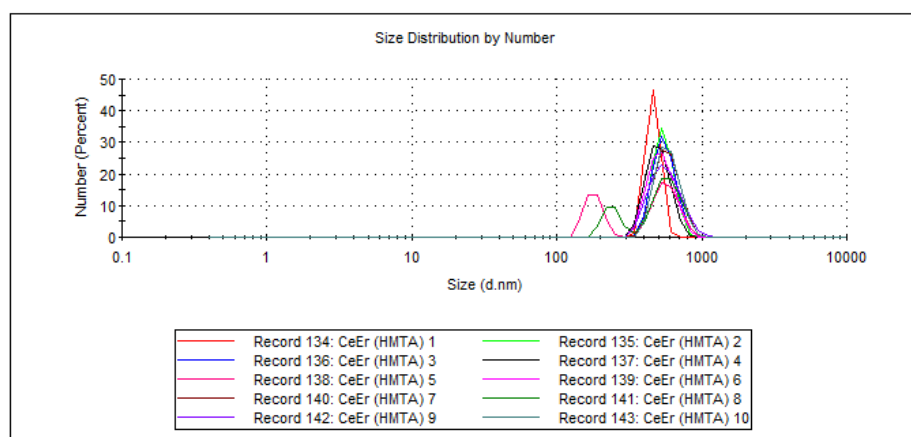

d iii)

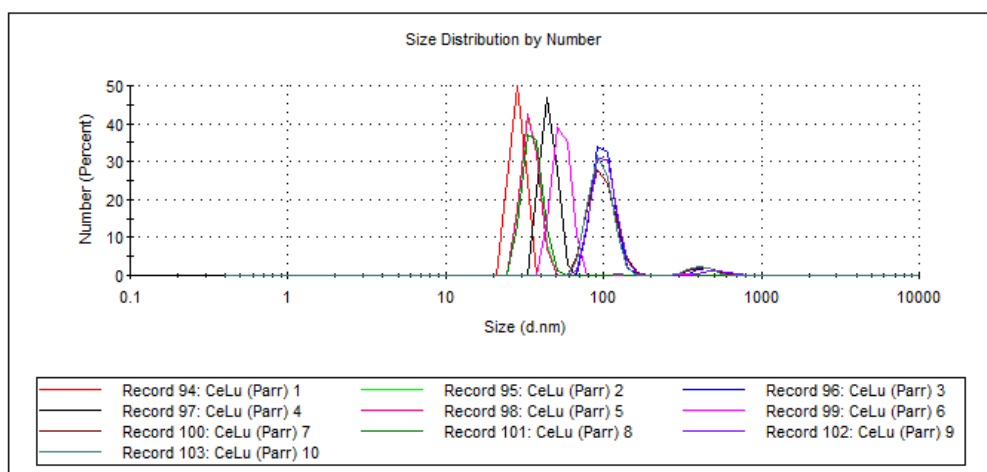

**Figure S4.** Analytical data for generated Er:CeO<sub>x</sub> (a) XRF [(i) ON, (ii) HMTA, (iii) TBA], (b) pXRD RT [(i) ON, (ii) HMTA, (iii) TBA], (b\*) pXRD 600°C [(i) ON, (ii) HMTA, (iii) TBA], (c) FTIR [(i) ON, (ii) HMTA, (iii) TBA], (d) DLS [(i) ON, (ii) HMTA, (iii) TBA].

a i)

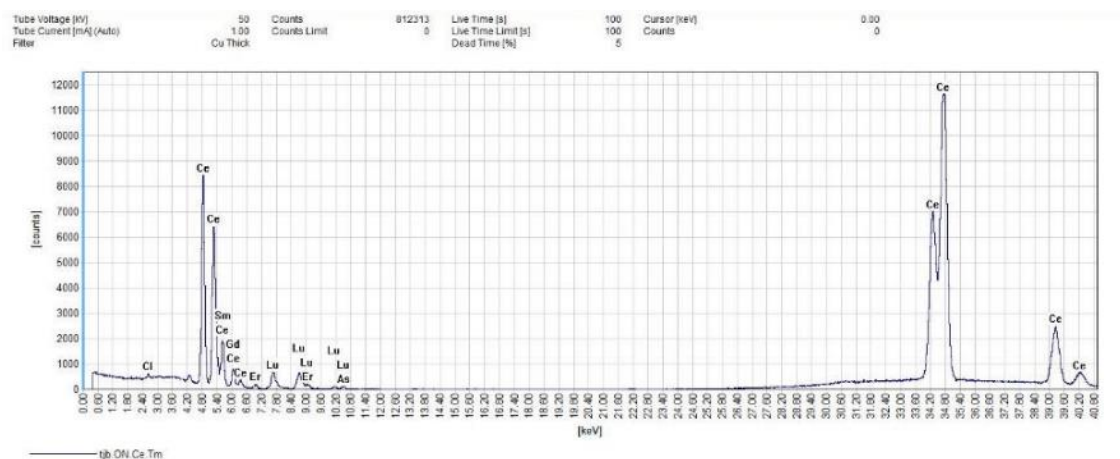

a ii)

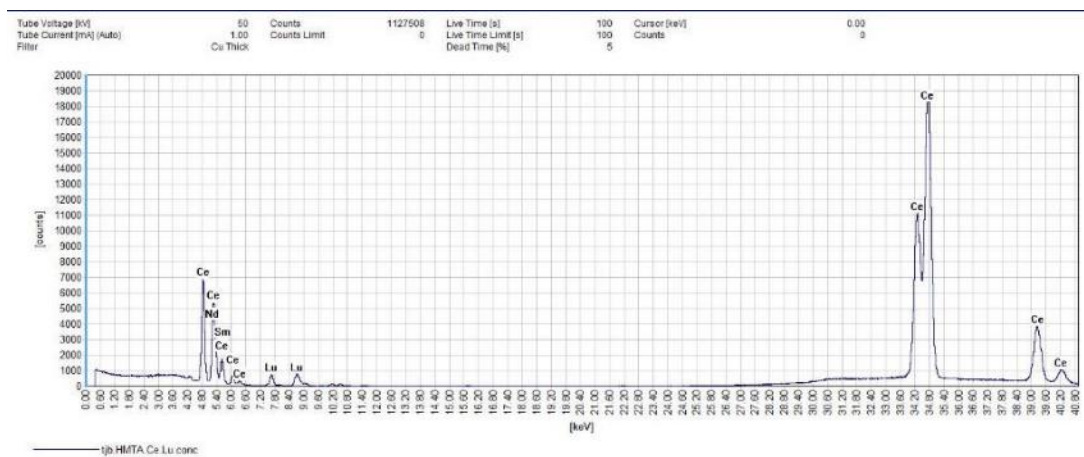

a iii)

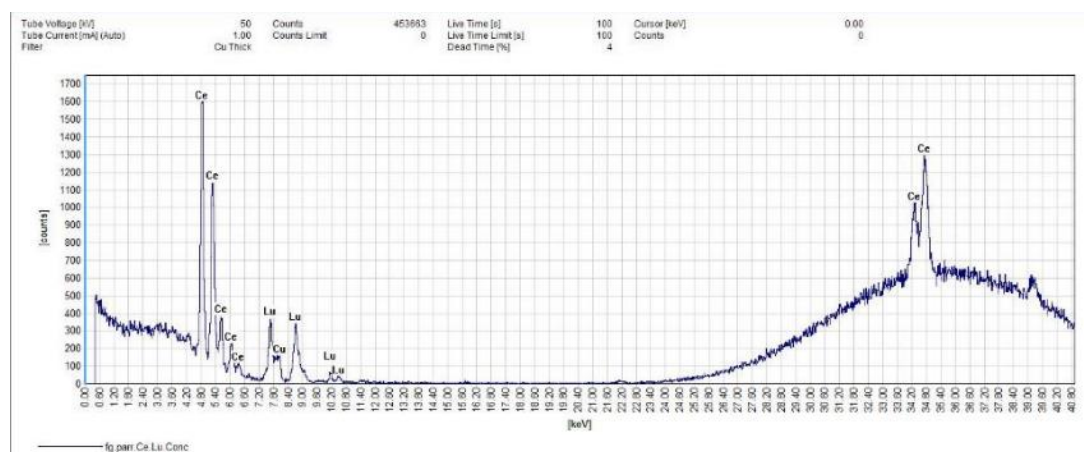

b i)

tjb.ON.Ce.Tm (Coupled TwoTheta/Theta)

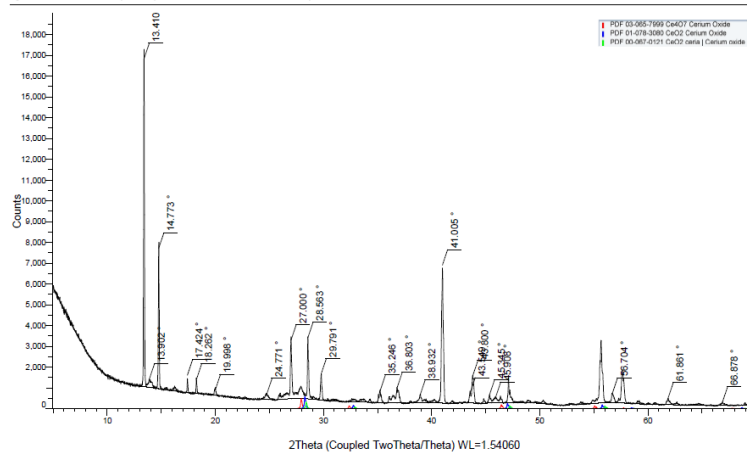

b ii)

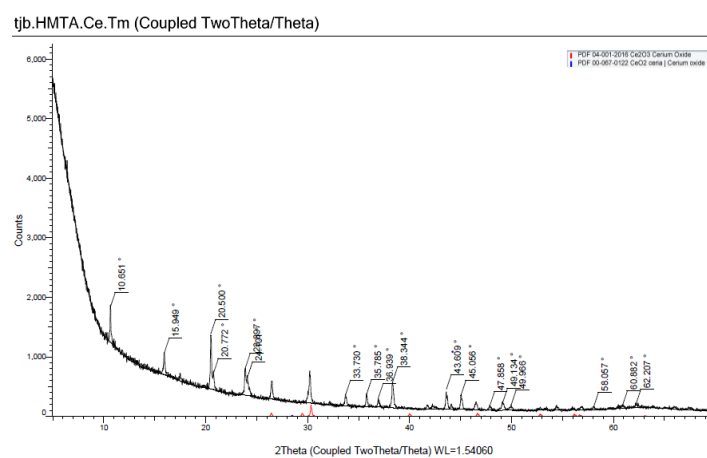

b iii)

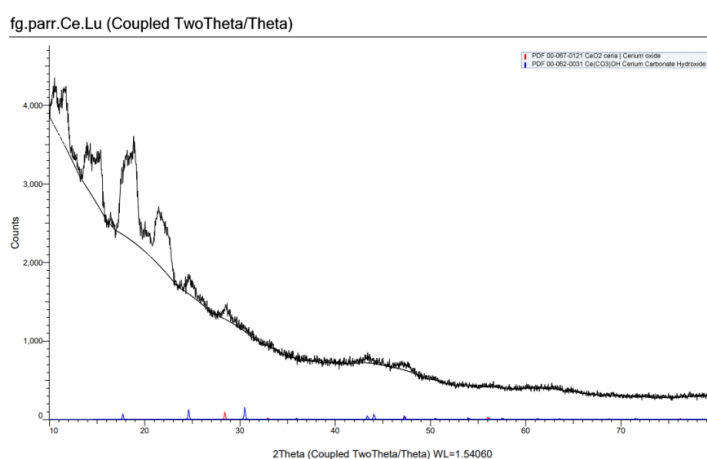

b\* i)

tjb.ON.Ce.Lu.600 (Coupled TwoTheta/Theta)

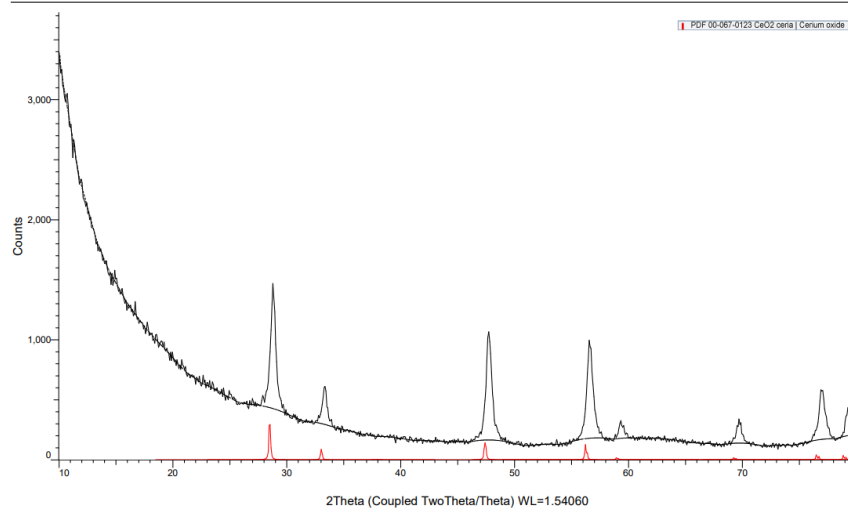



b\* ii)

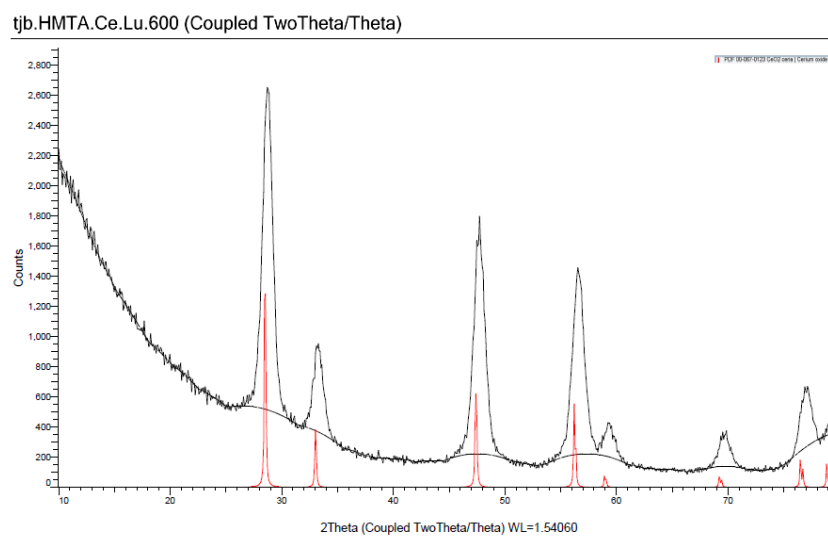

b\* iii) too little material

c i)

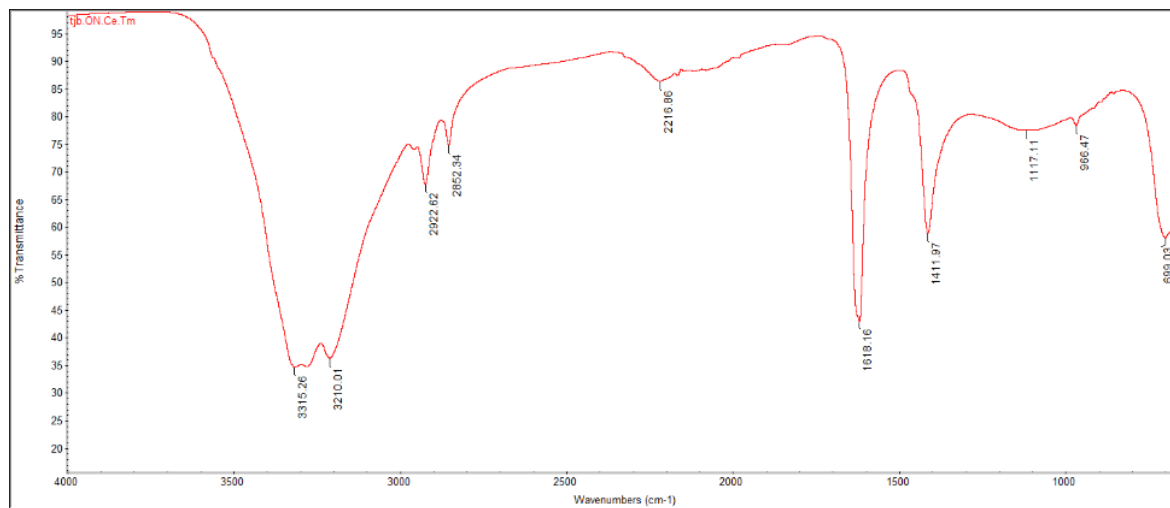

c ii)

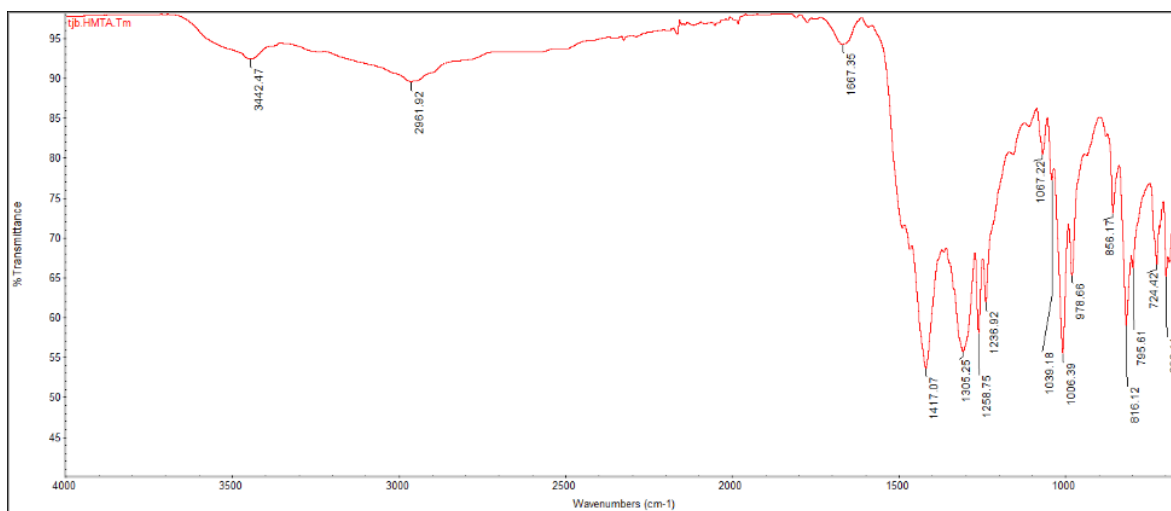

c iii)

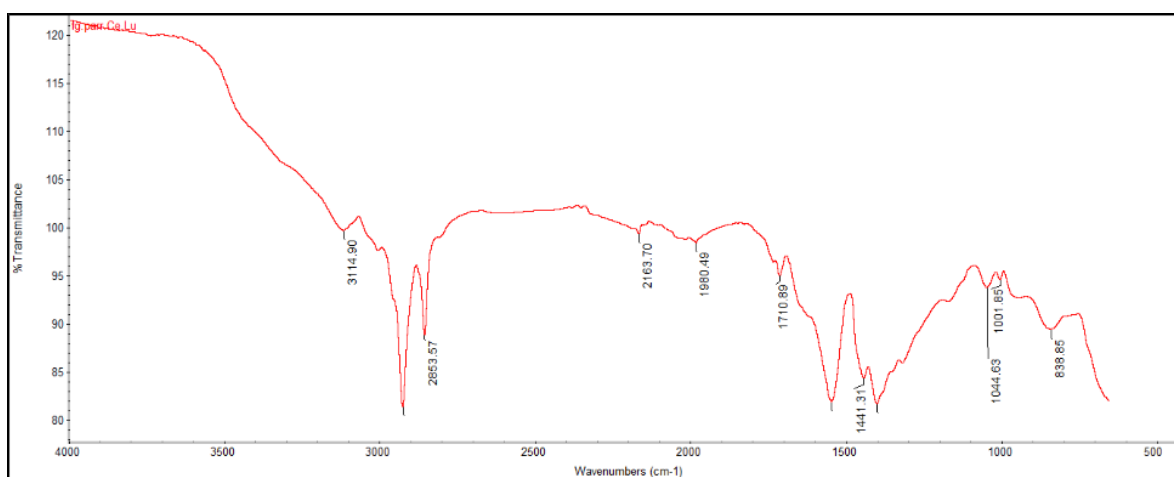

d i)

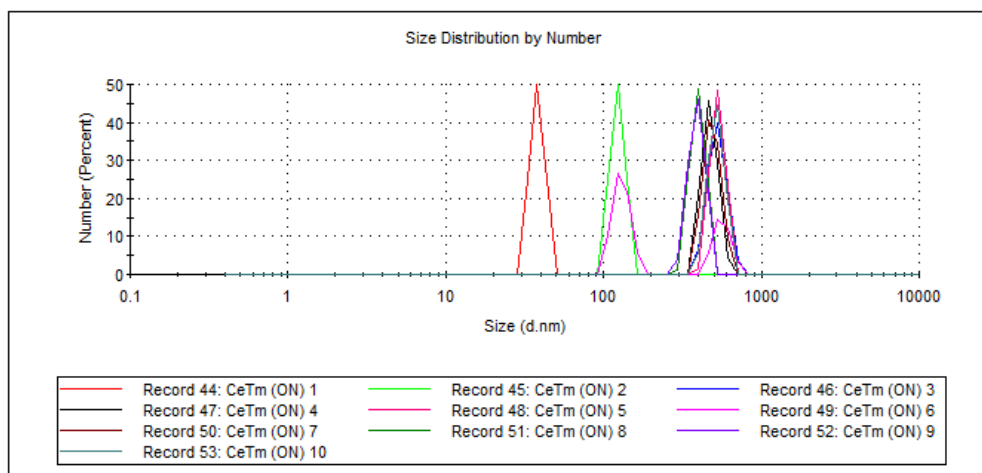

d ii)

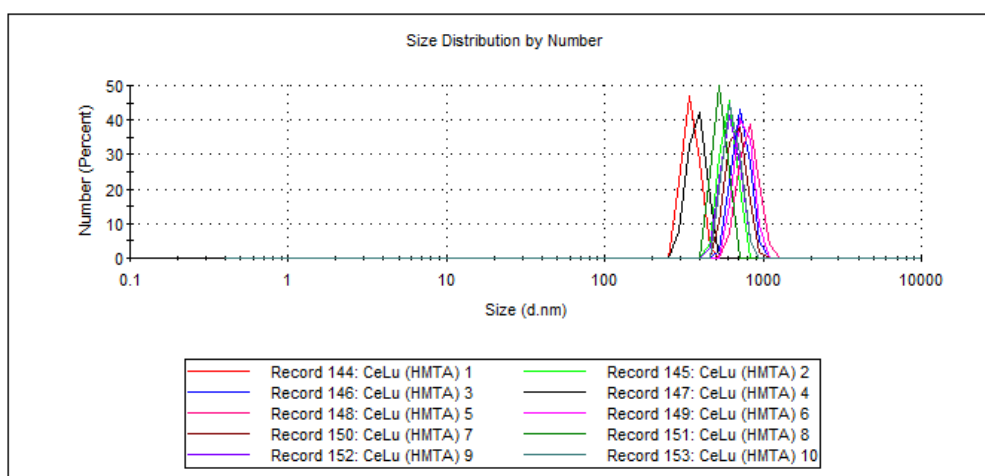

d iii)

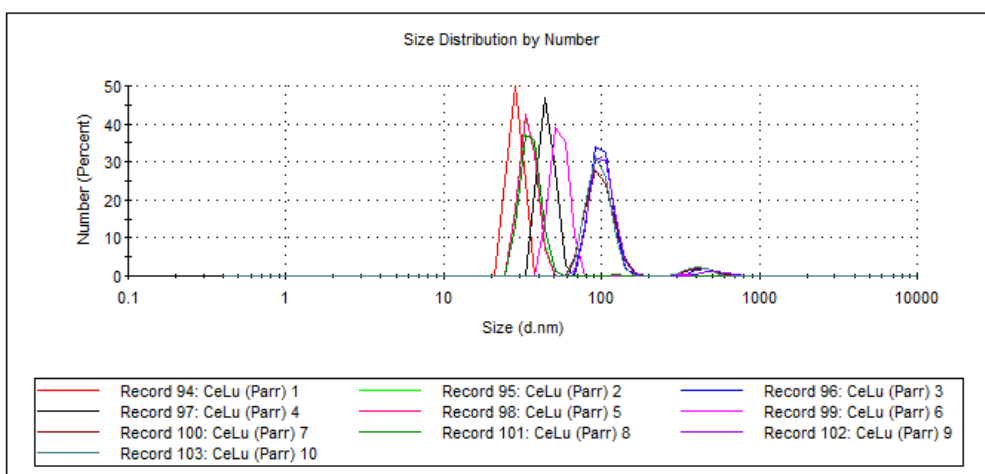

**Figure S5.** Analytical data for generated Lu:CeO<sub>x</sub> (a) XRF [(i) ON, (ii) HMTA, (iii) TBA], (b) pXRD RT [(i) ON, (ii) HMTA, (iii) TBA], (b\*) pXRD 600°C [(i) ON, (ii) HMTA, (iii) TBA], (c) FTIR [(i) ON, (ii) HMTA, (iii) TBA], (d) DLS [(i) ON, (ii) HMTA, (iii) TBA].
